# Supplementary material for: Novel Locally Active Estrogens Accelerate Cutaneous Wound Healing-Part 2
Source: PubMed Central journal article supplement (PMC5451472; doi:10.1038/s41598-017-02820-y), 2017-05-31

# Novel Locally Active Estrogens Accelerate Cutaneous Wound Healing-Part 2.

*Mario Brufani†+, Nicoletta Rizzi#+, Clara Meda#, Luigi Filocamo\*†, Francesca Ceccacci\*◇,  
Virginia D’Aiutoδ, Gabriele Bartoliδ, Angela La Bellaδ, Luisa M. Mignecoδ, Rinaldo Marini  
Bettoloδ, Francesca Leonelli◇, Paolo Ciana# and Adriana Maggi\*#*

†Dipartimento di Scienze Biochimiche “A. Rossi Fanelli”, Università degli Studi di Roma “La Sapienza”, Via degli Apuli 9, I-00185 Roma, Italy

δDipartimento di Chimica “S. Cannizzaro” and ◇ Dipartimento di Biologia Ambientale, Università degli Studi di Roma “La Sapienza”, P.le Aldo Moro 5, I-00185 Roma, Italy

◇ Istituto di Metodologie Chimiche-CNR, Unità Organizzativa di Supporto, Sede di Roma, Università degli Studi di Roma “La Sapienza”, P. le Aldo Moro, 5, I-00185 Roma, Italy

#Centre of Excellence on Neurodegenerative Diseases, Università degli Studi di Milano, Via Balzaretti, 9, I-20133 Milano, Italy

## Table of Contents

<sup>1</sup>H-NMR, <sup>13</sup>C-NMR spectra of new 17β-estradiol derivatives **1**, **6** and **7**

|           |             |
|-----------|-------------|
| <b>1a</b> | pg. S3-S4   |
| <b>1b</b> | pg. S5-S6   |
| <b>1c</b> | pg. S7-S8   |
| <b>1d</b> | pg. S8-S10  |
| <b>1e</b> | pg. S11-S12 |
| <b>1f</b> | pg. S13-S14 |
| <b>1g</b> | pg. S15-S16 |
| <b>1h</b> | pg. S17-S18 |
| <b>6a</b> | pg. S19-S20 |
| <b>6b</b> | pg. S21-S22 |
| <b>7</b>  | pg. S23-S24 |

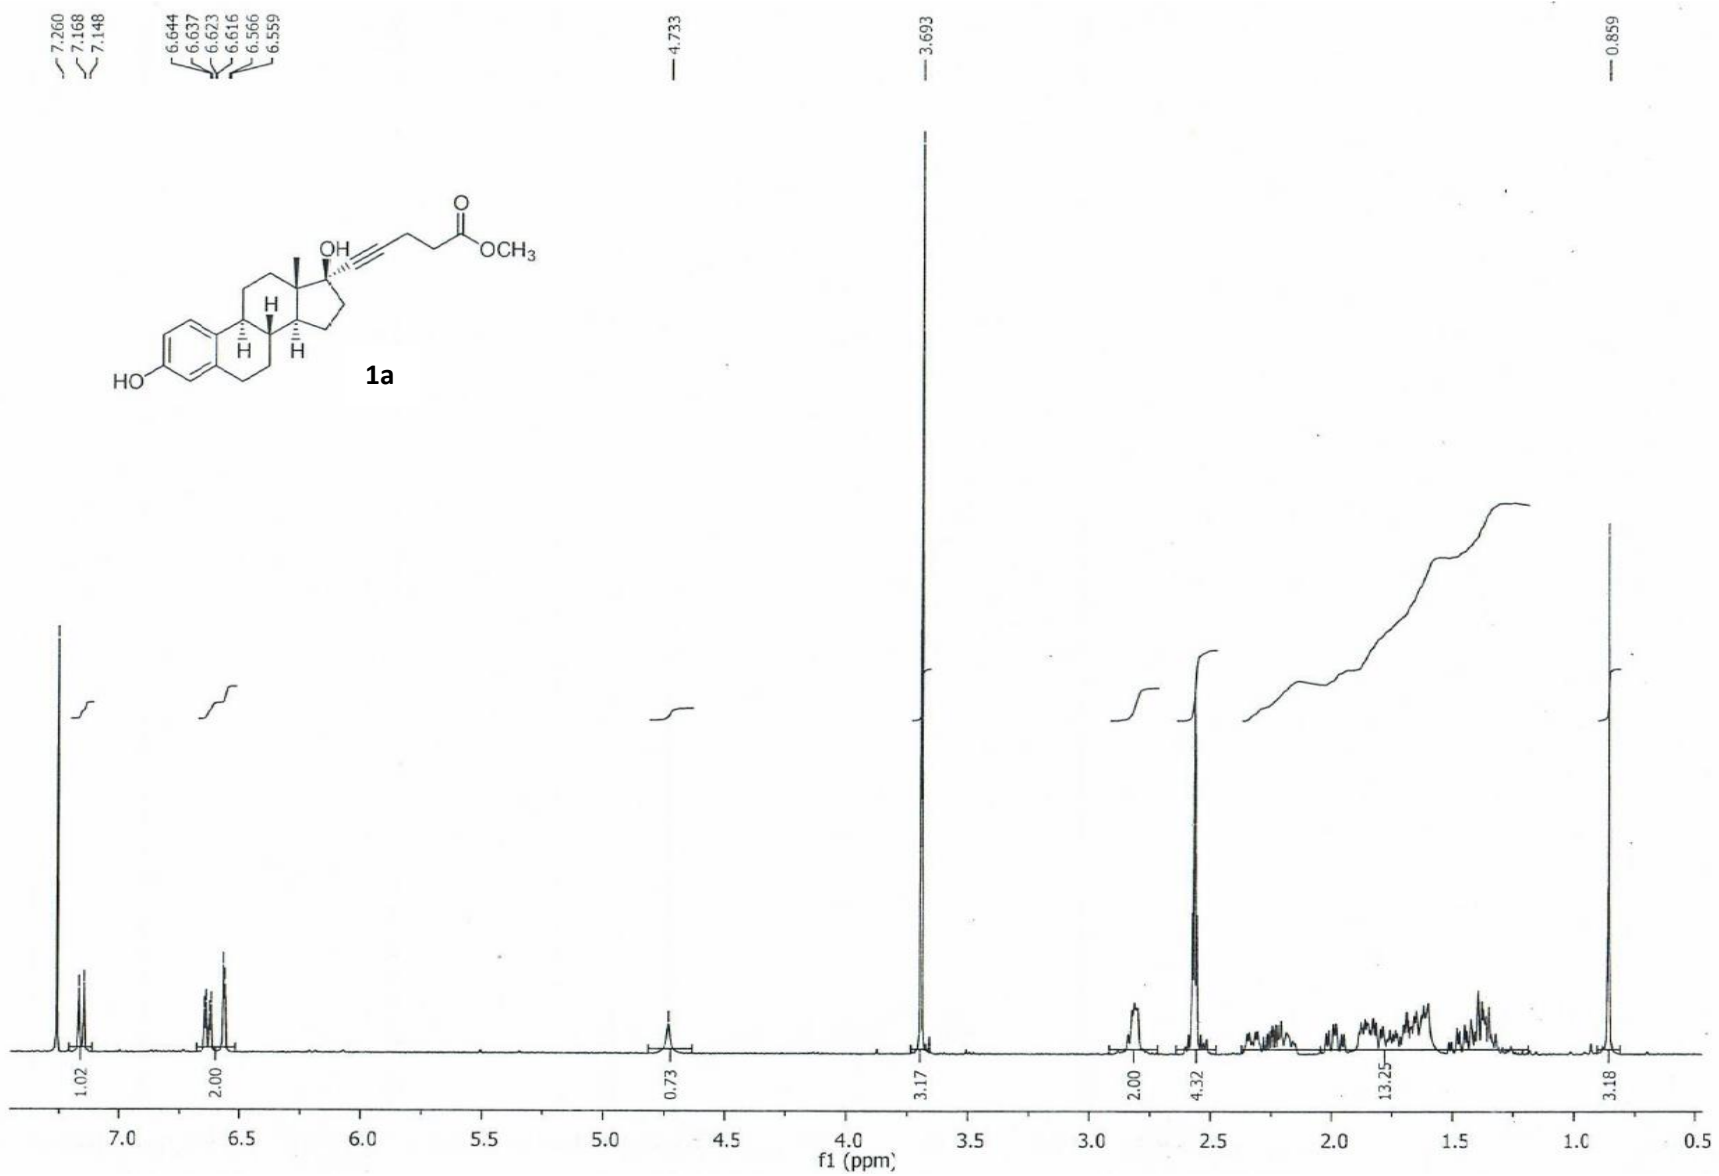

— 172.4600

— 153.4952

— 138.4069

— 132.7389

— 126.6658

— 115.3677

— 112.8071

84.7061  
84.3669  
80.0743  
77.5840  
77.1604  
76.7371

51.9501  
49.5562  
47.3093  
43.7156  
39.5572  
39.1322

33.7857  
32.9580  
29.7957  
27.3491  
26.6034  
22.9248

— 15.0369  
— 12.9226

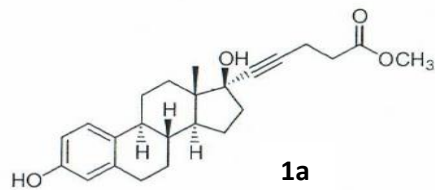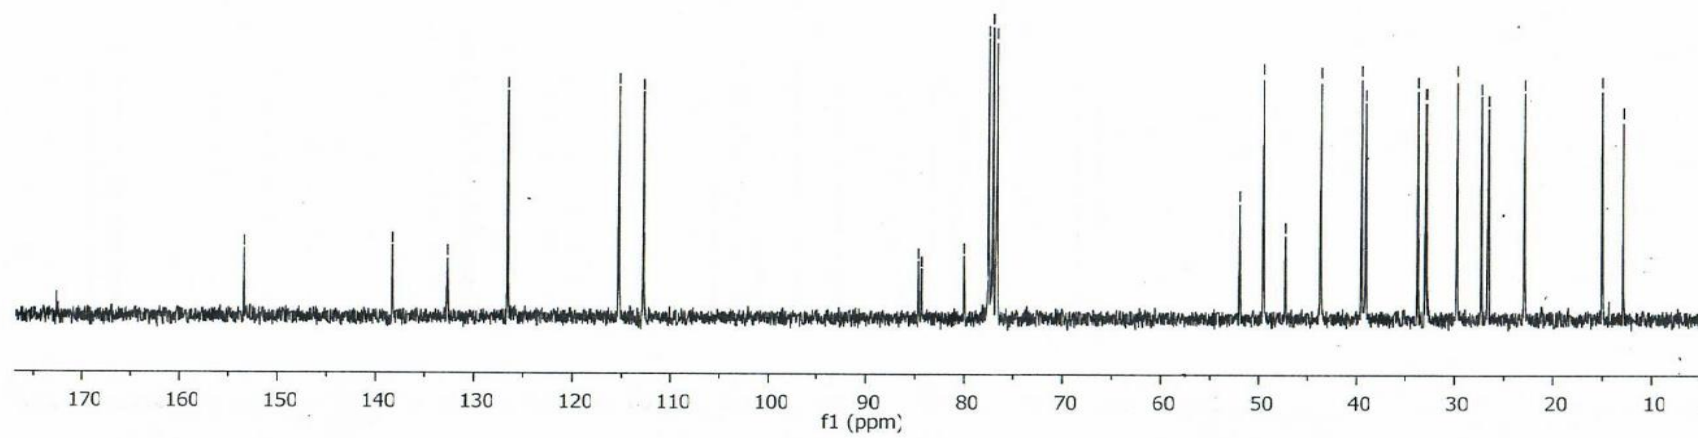

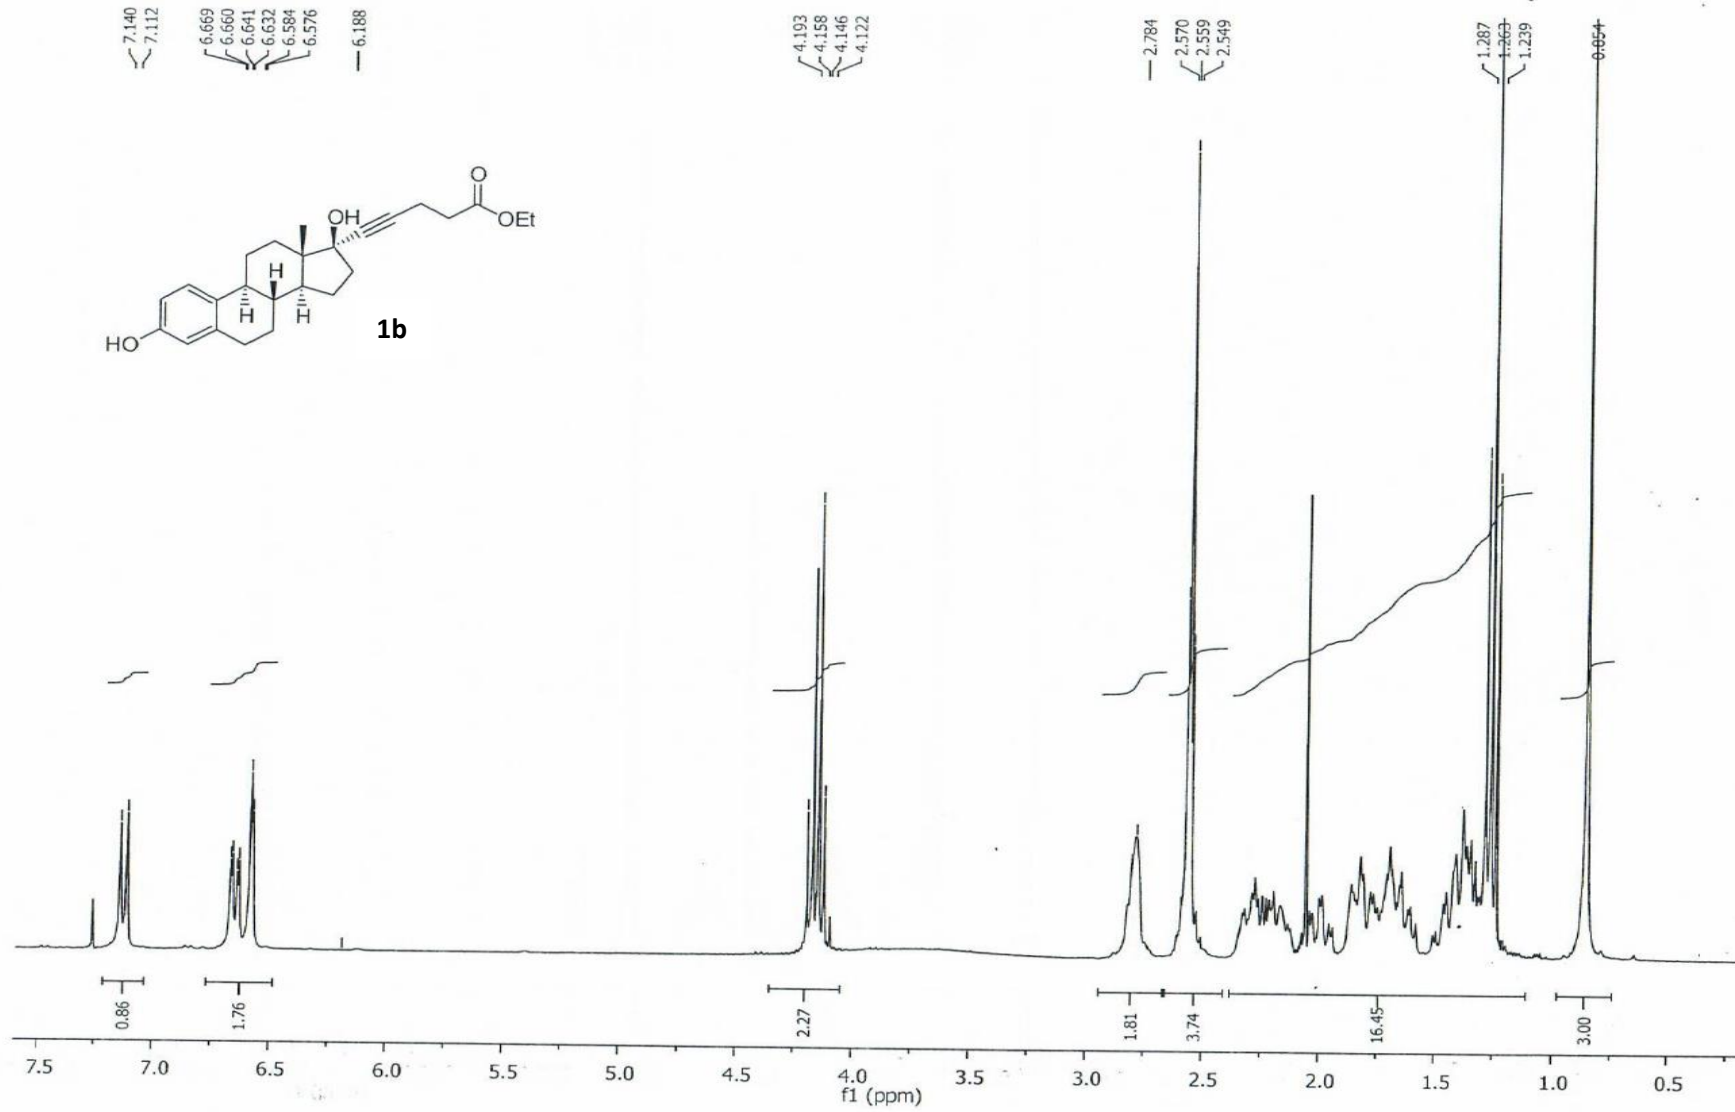

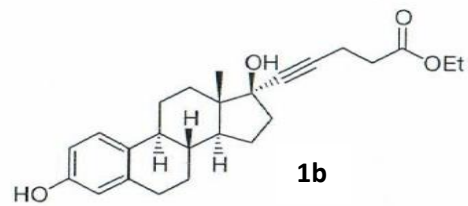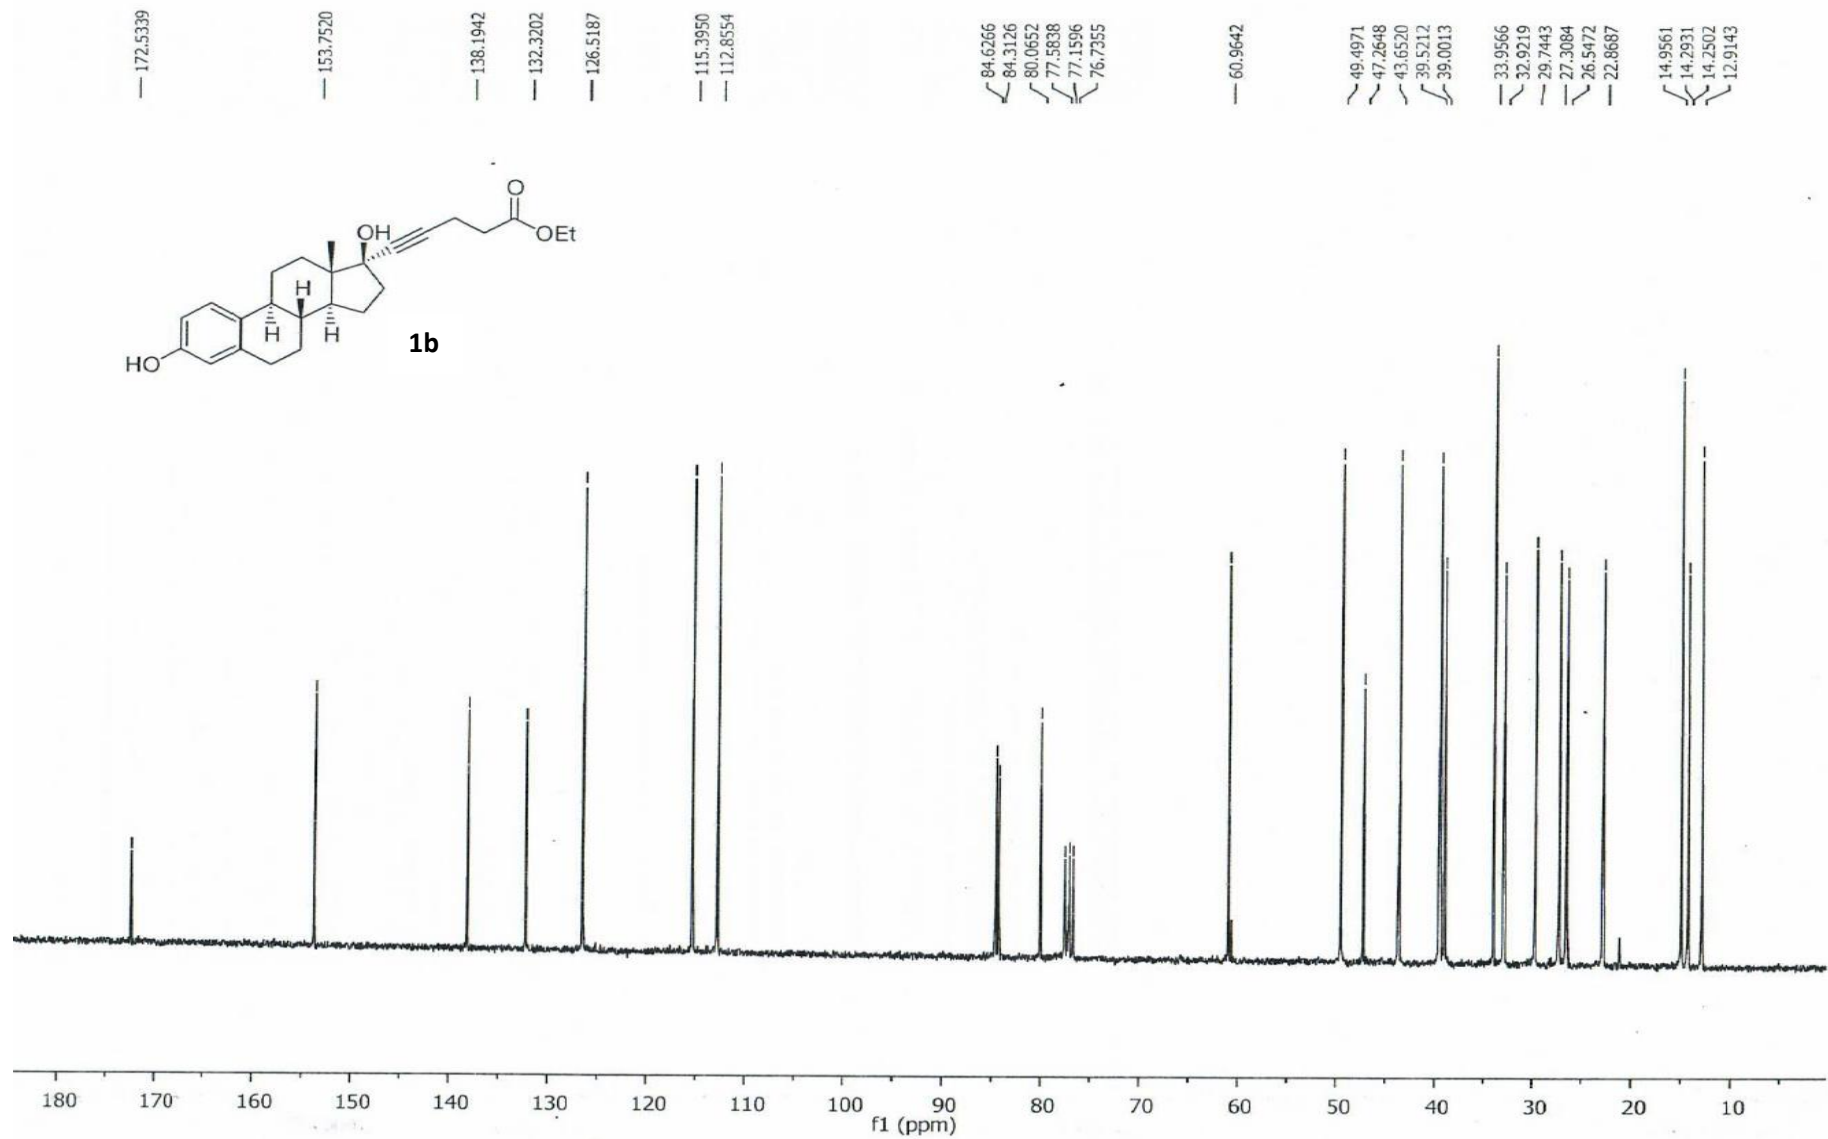

7.260  
7.160  
7.132

6.655  
6.646  
6.627  
6.618  
6.572  
6.563

4.077  
4.055  
4.032

2.798  
2.575  
2.568  
2.560

0.959  
0.934  
0.909  
0.855

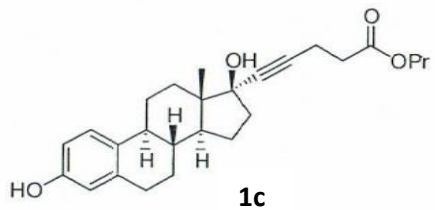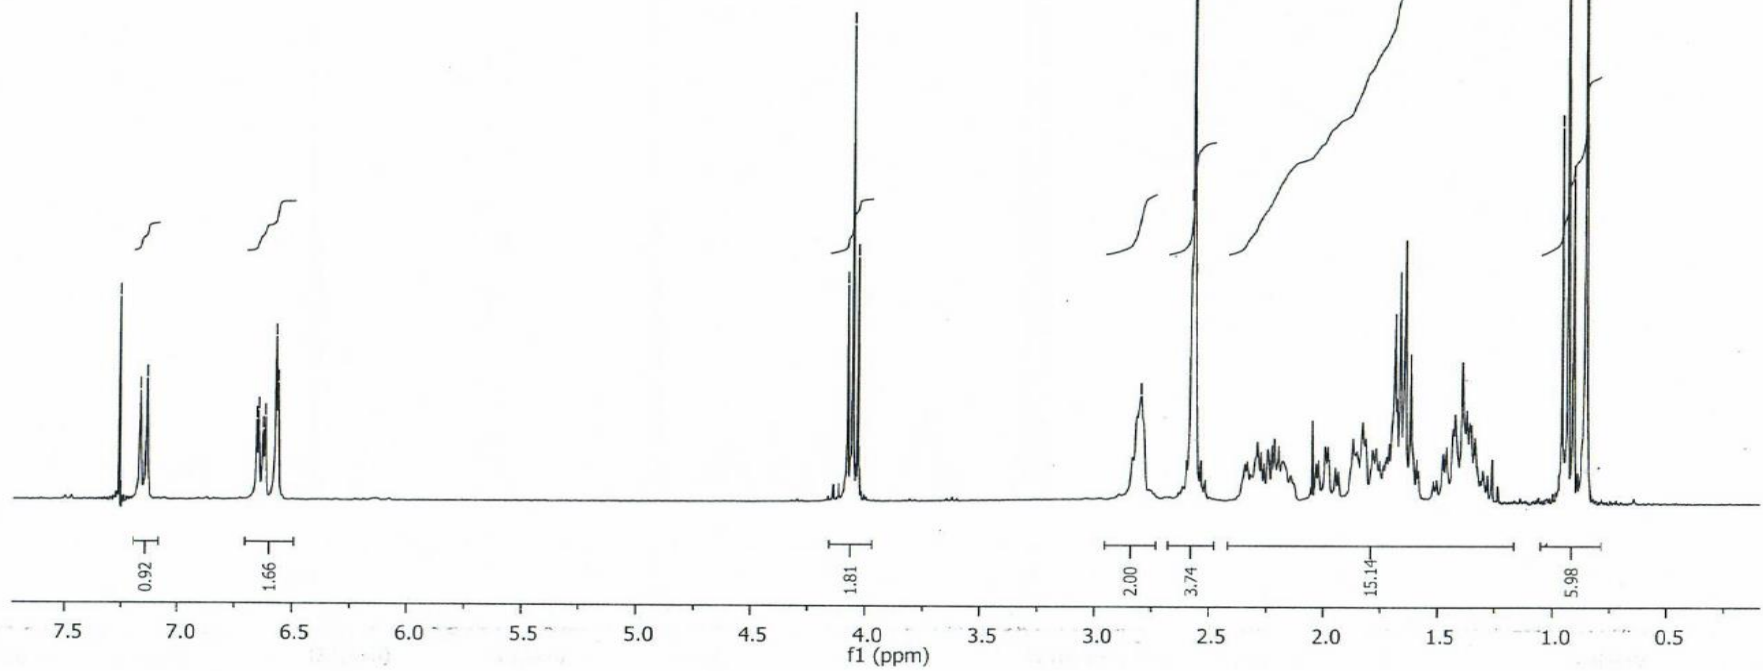

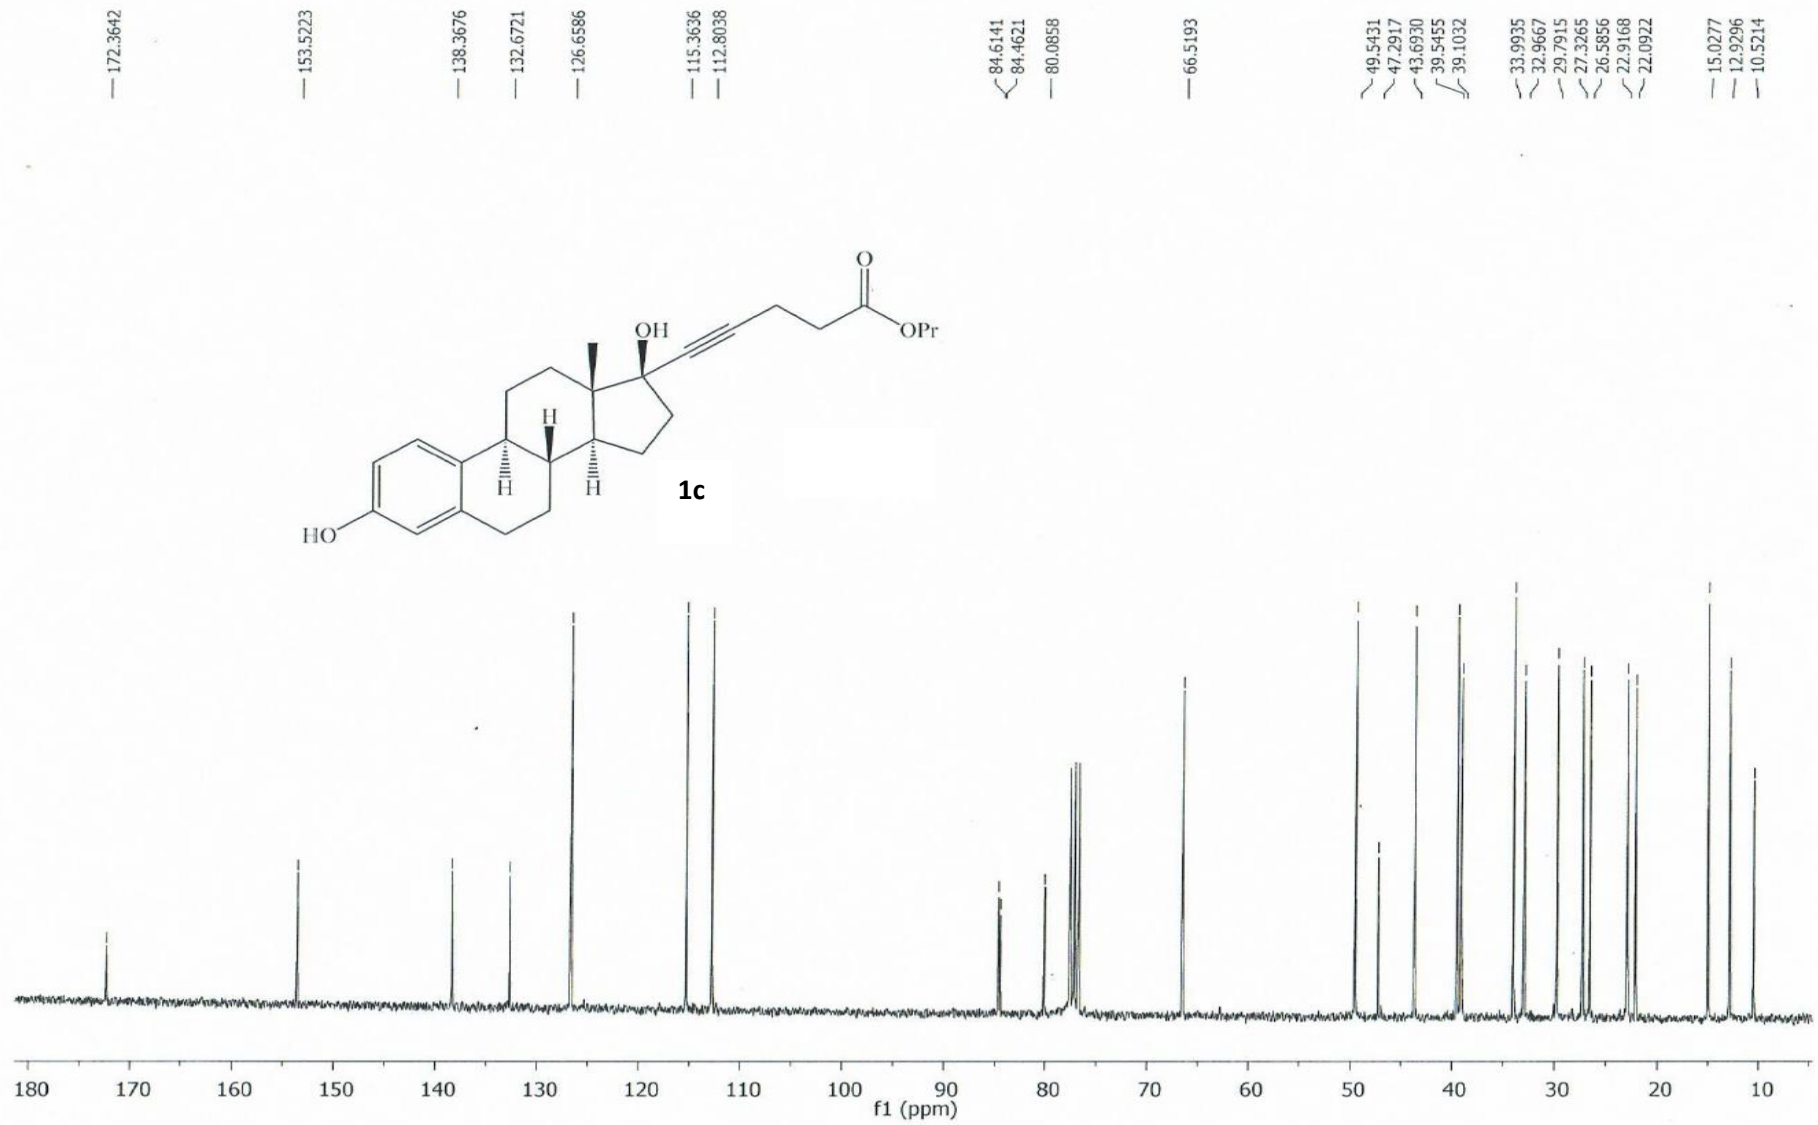



7.260  
7.156  
7.128

6.658  
6.649  
6.630  
6.621  
6.575

5.089  
5.068  
5.047  
5.026  
5.006  
4.985  
4.964

0.857

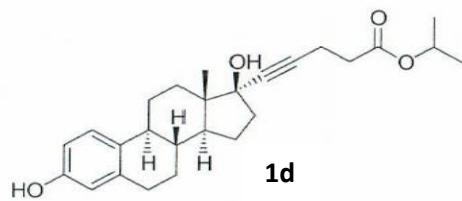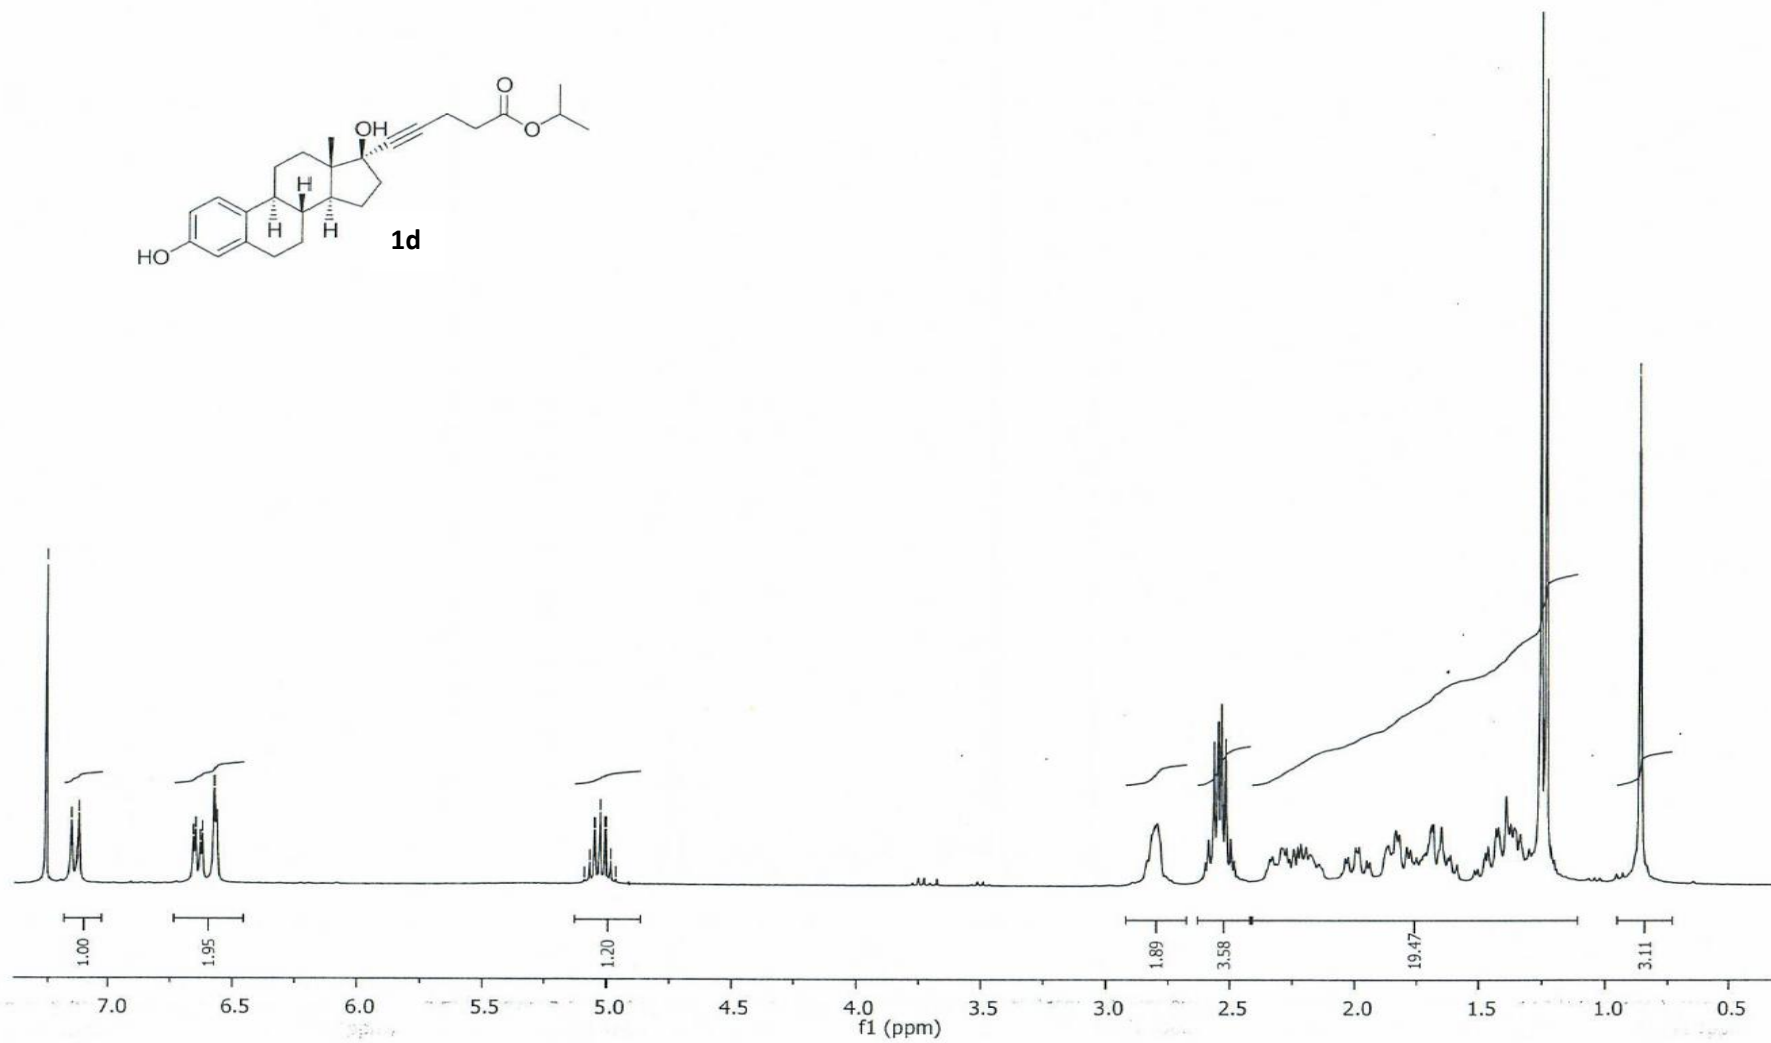

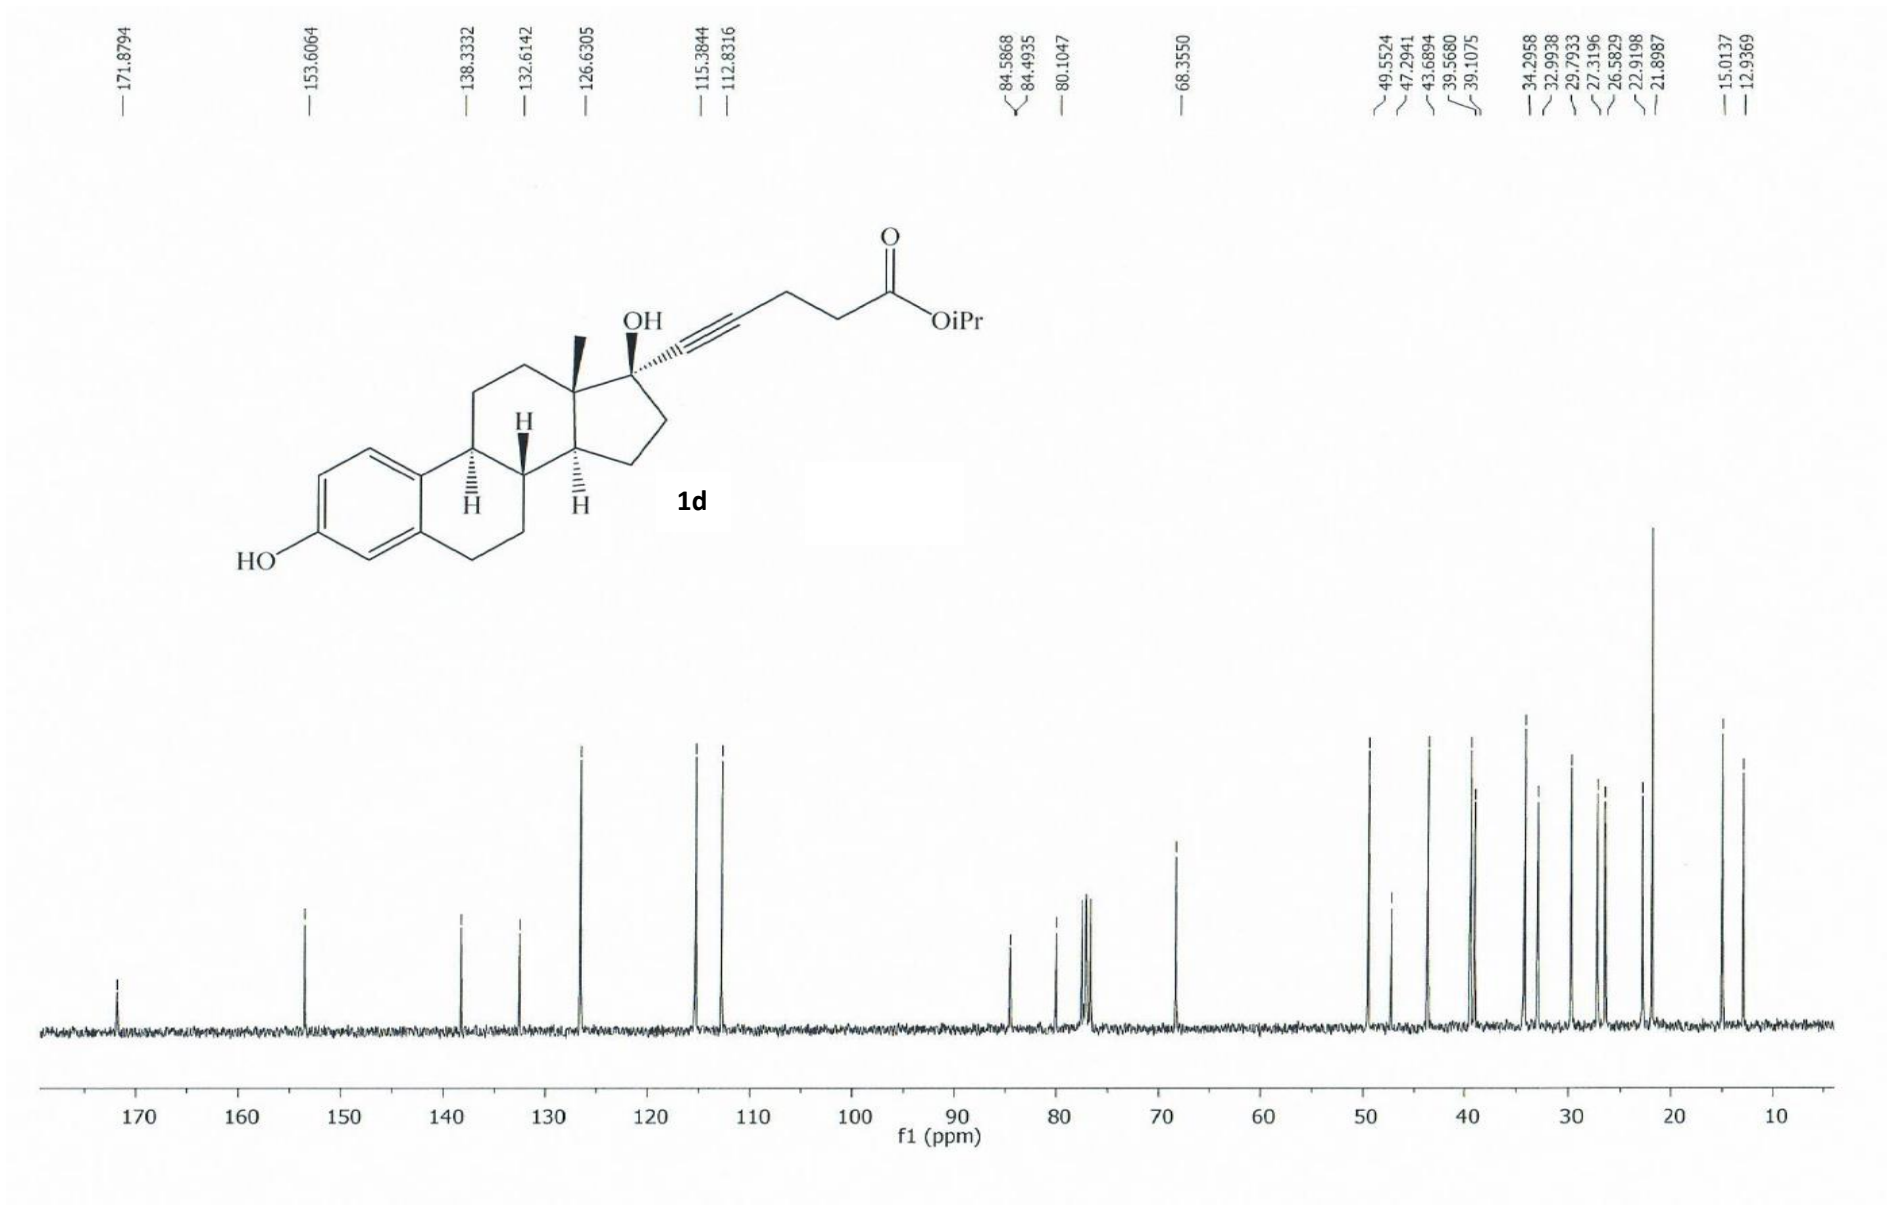

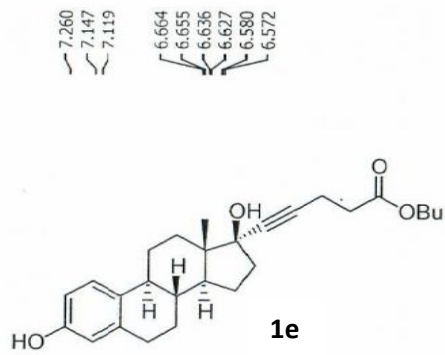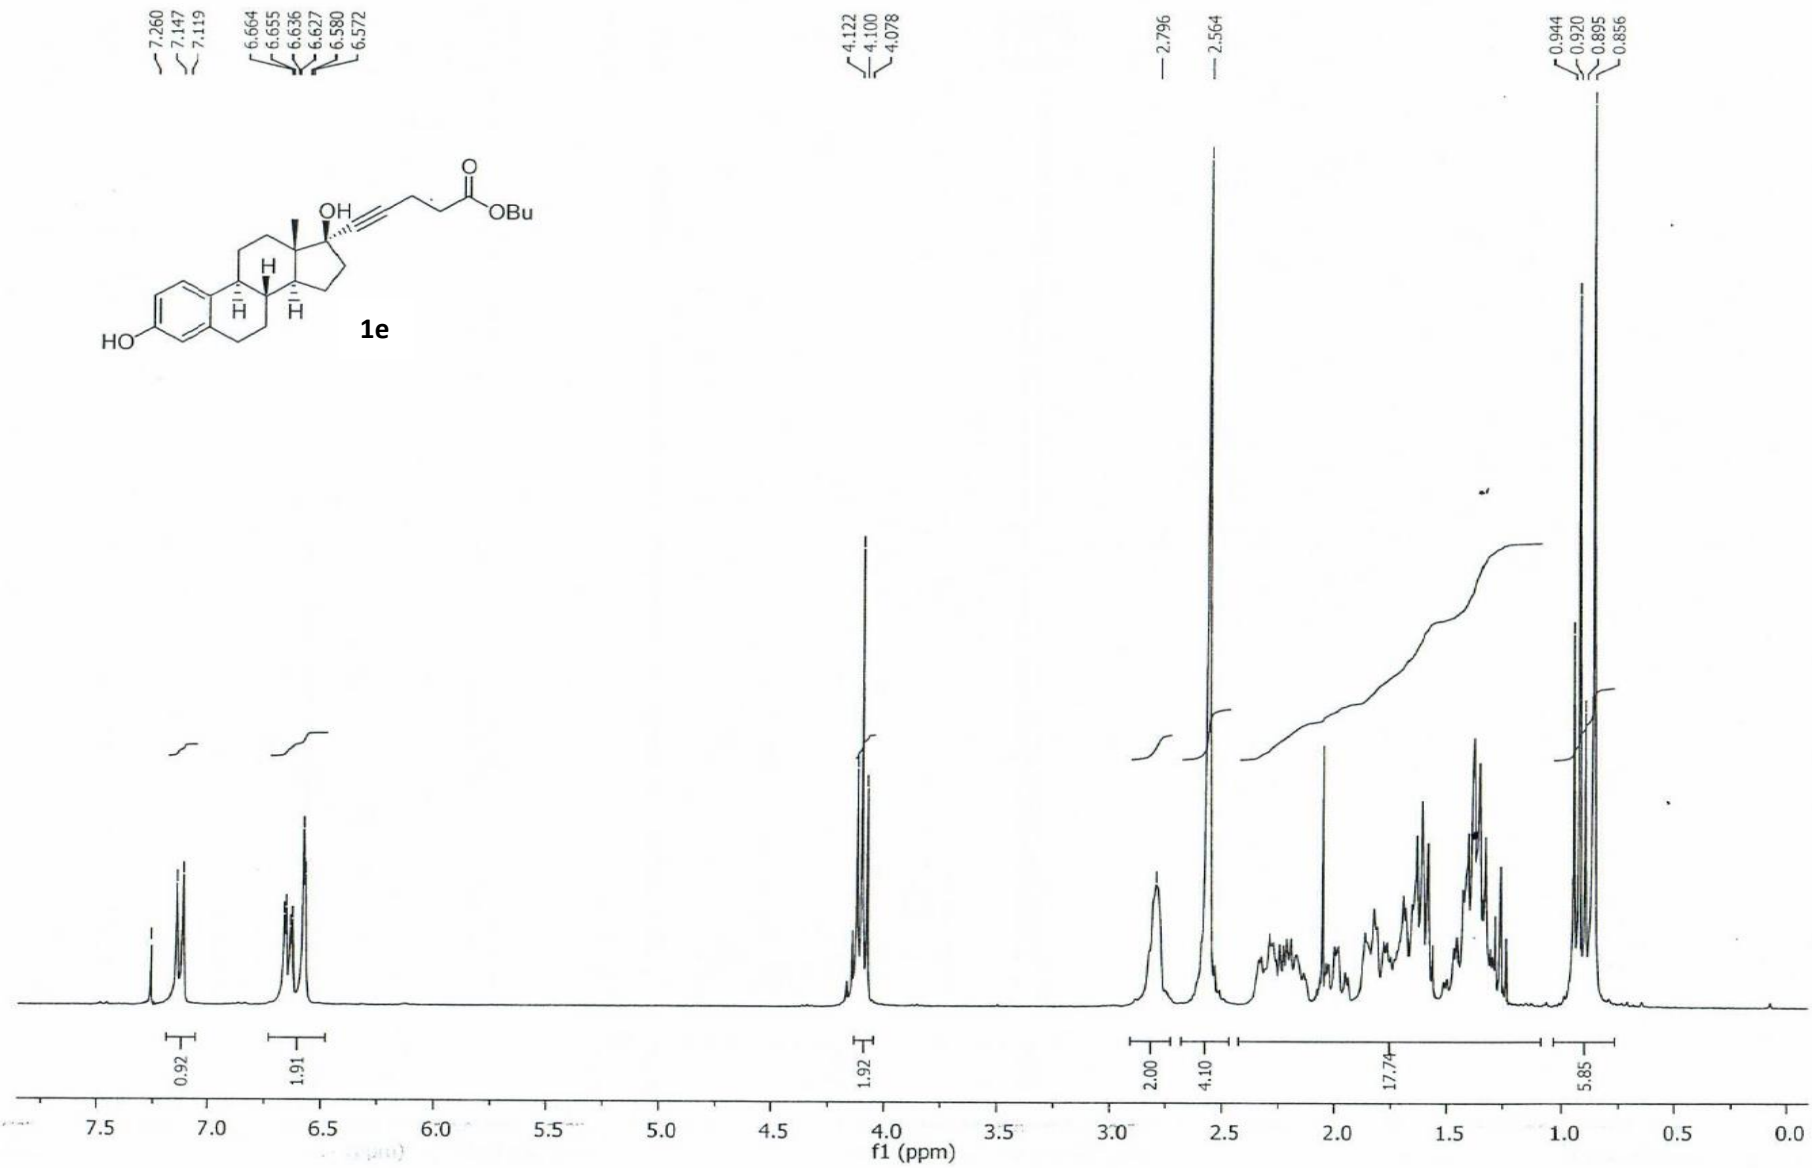

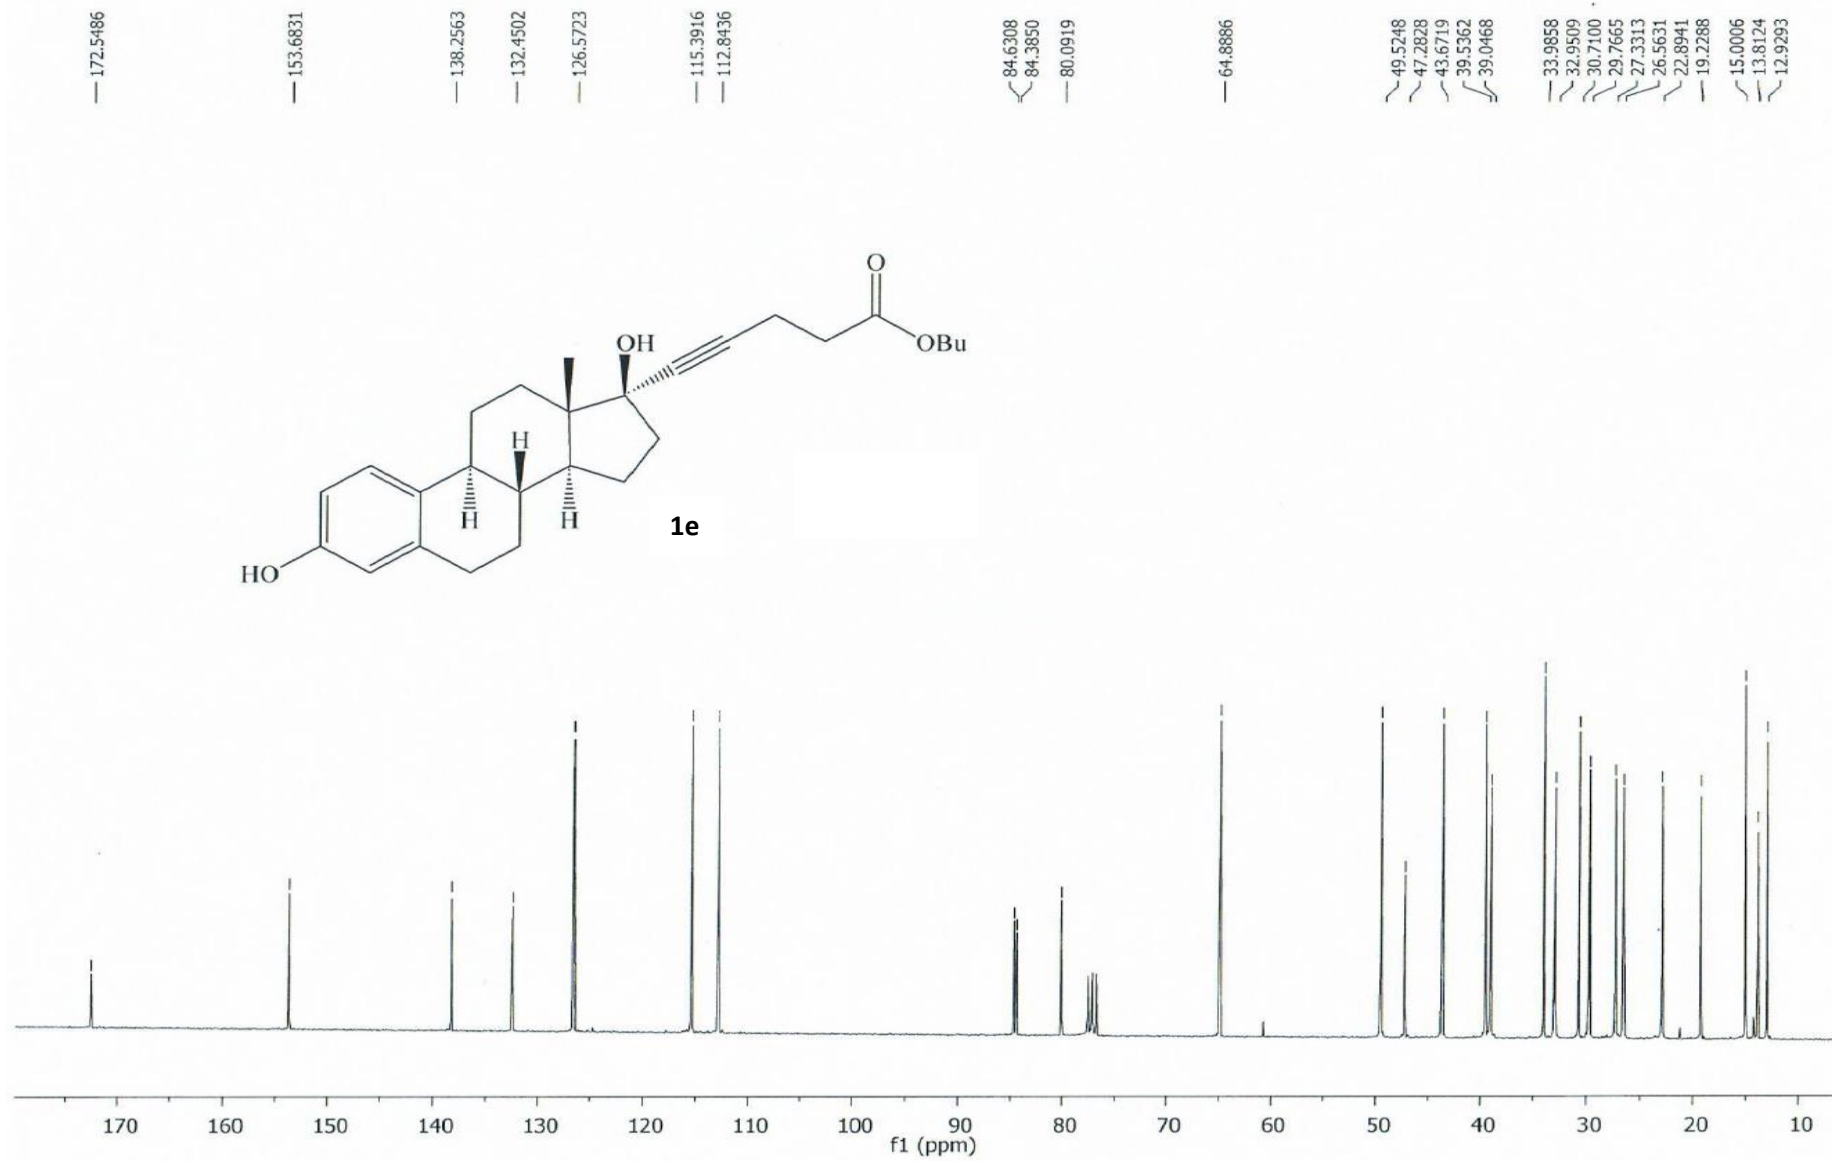

7.260  
7.137  
7.109

6.685  
6.657  
6.607

4.126  
4.103  
4.080

2.786  
2.575

0.901  
0.869

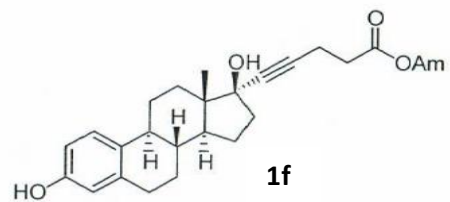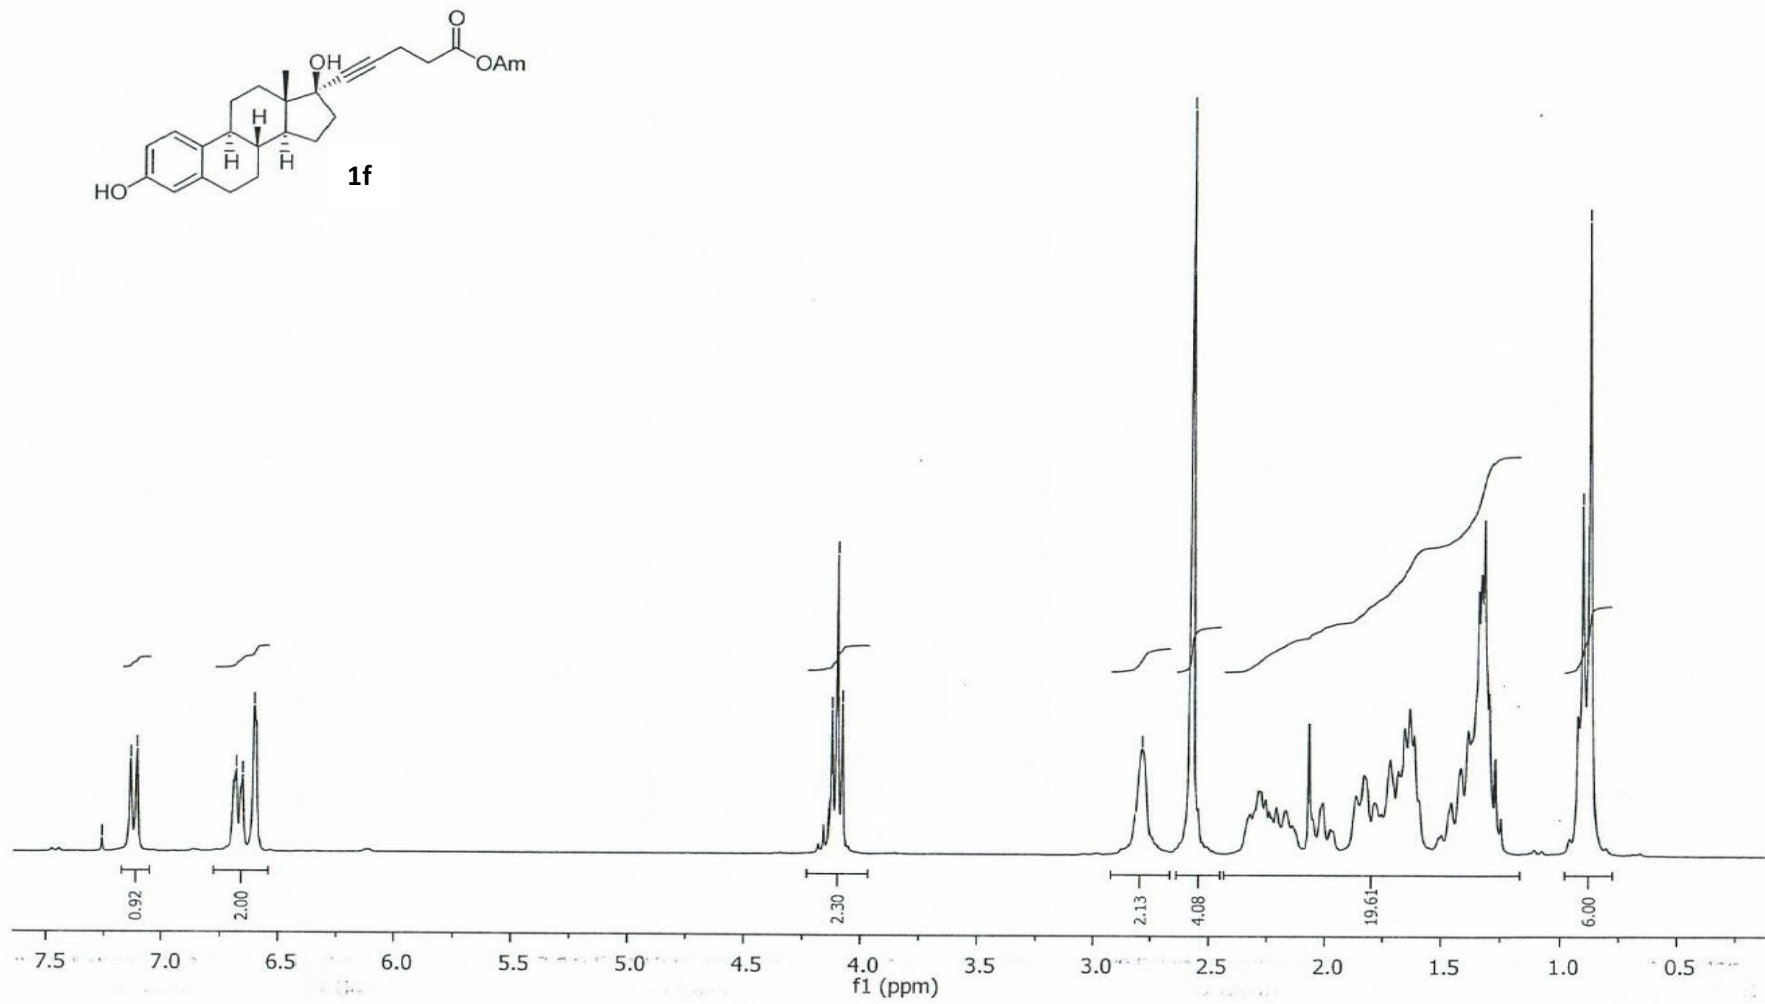

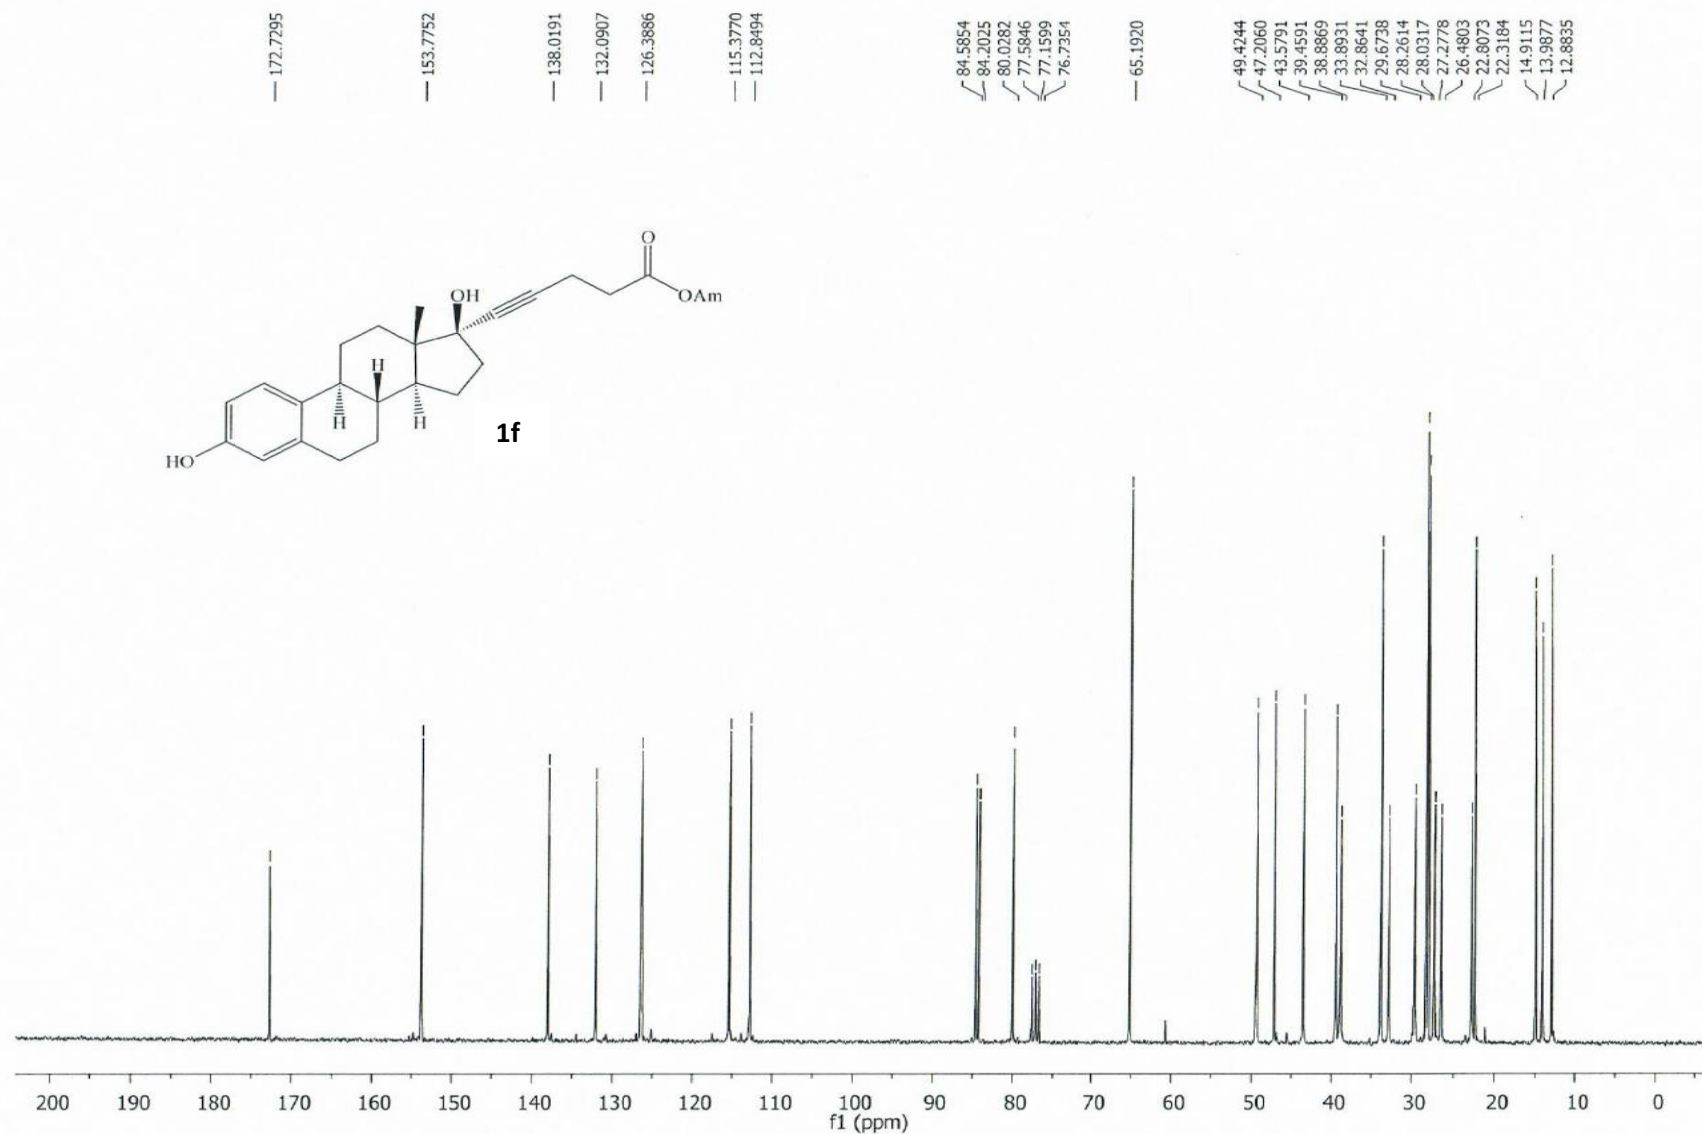

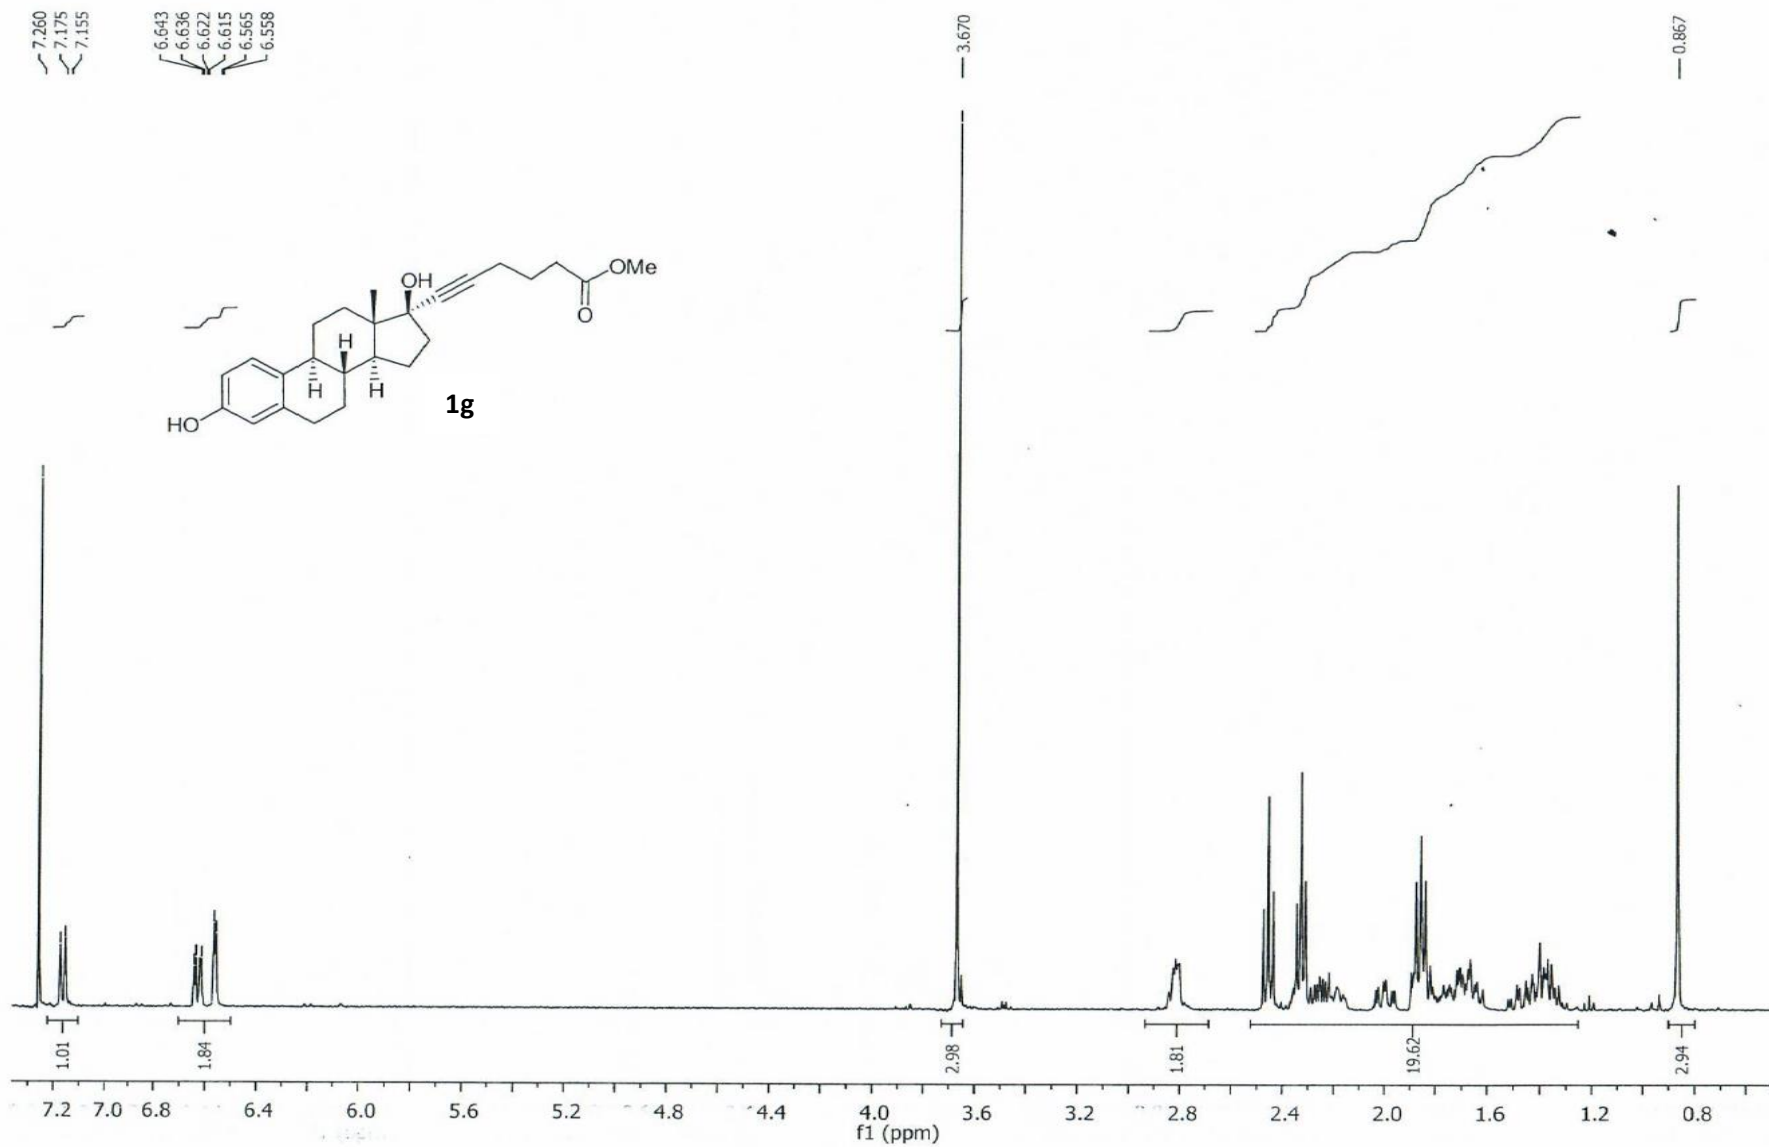

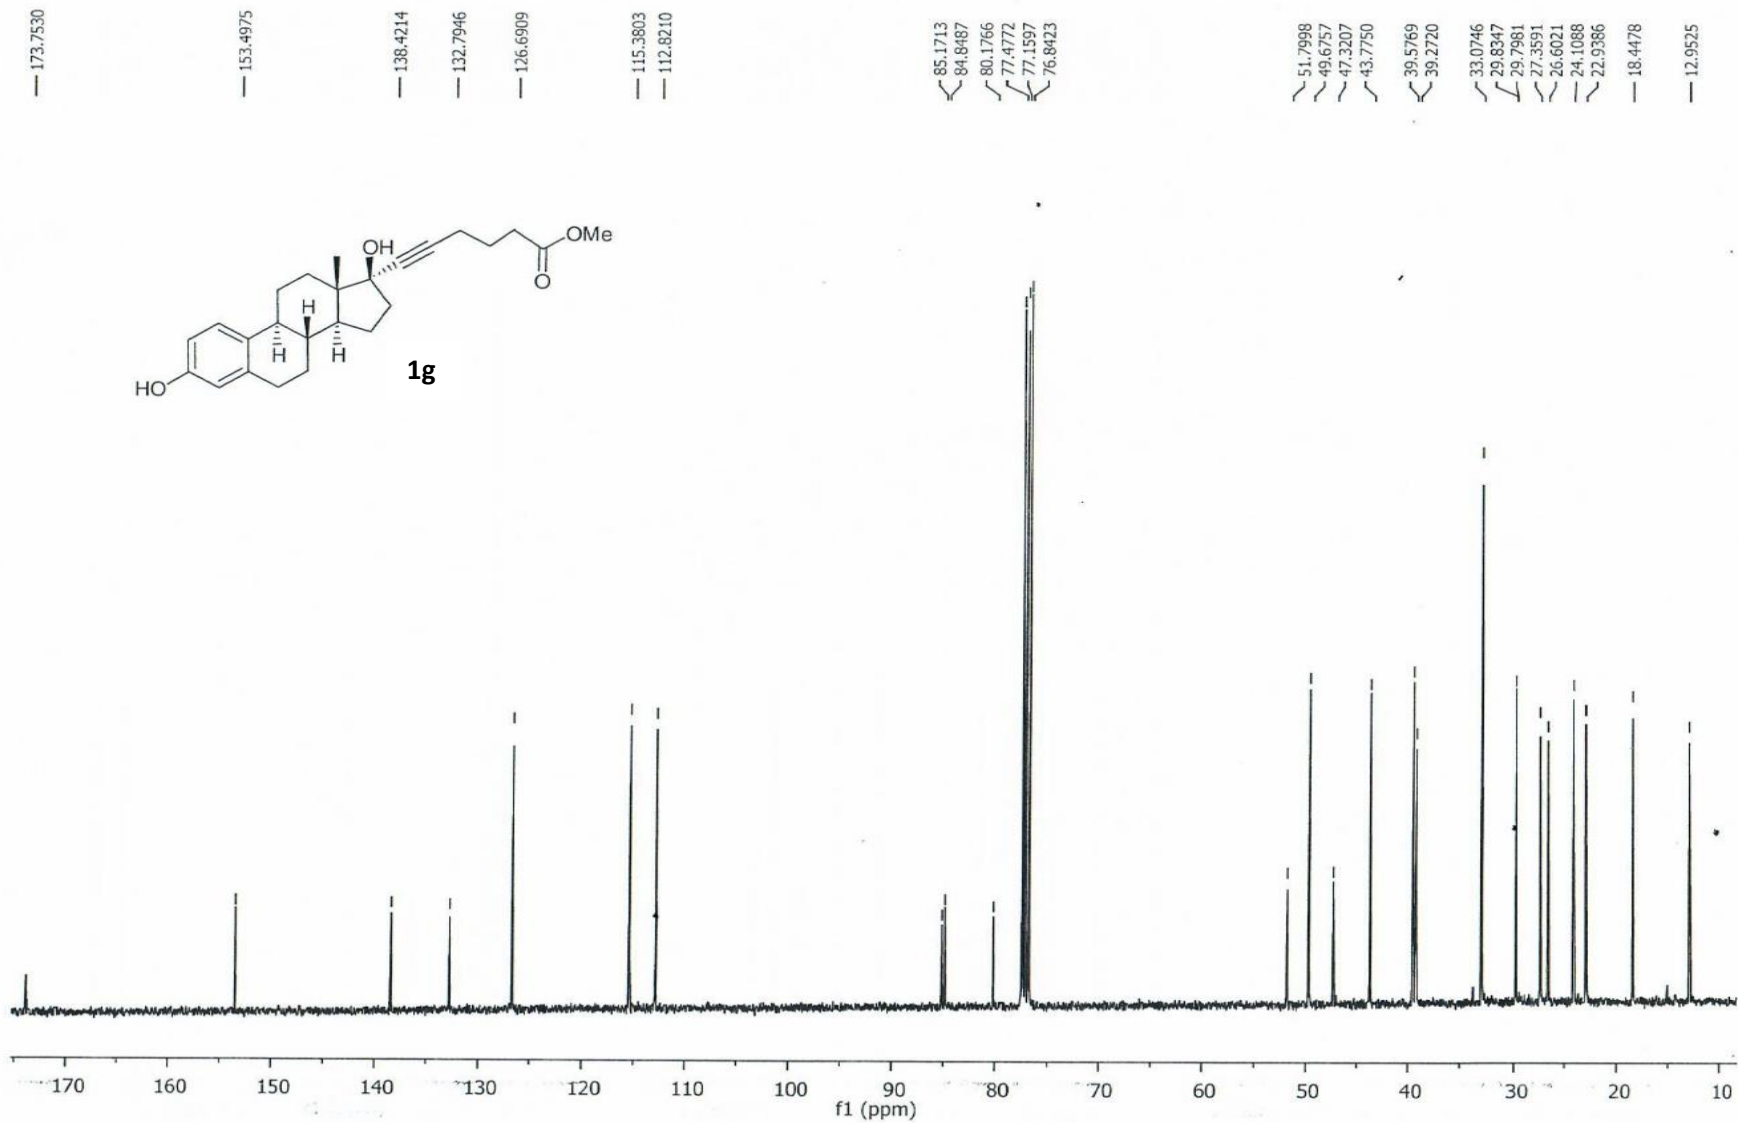



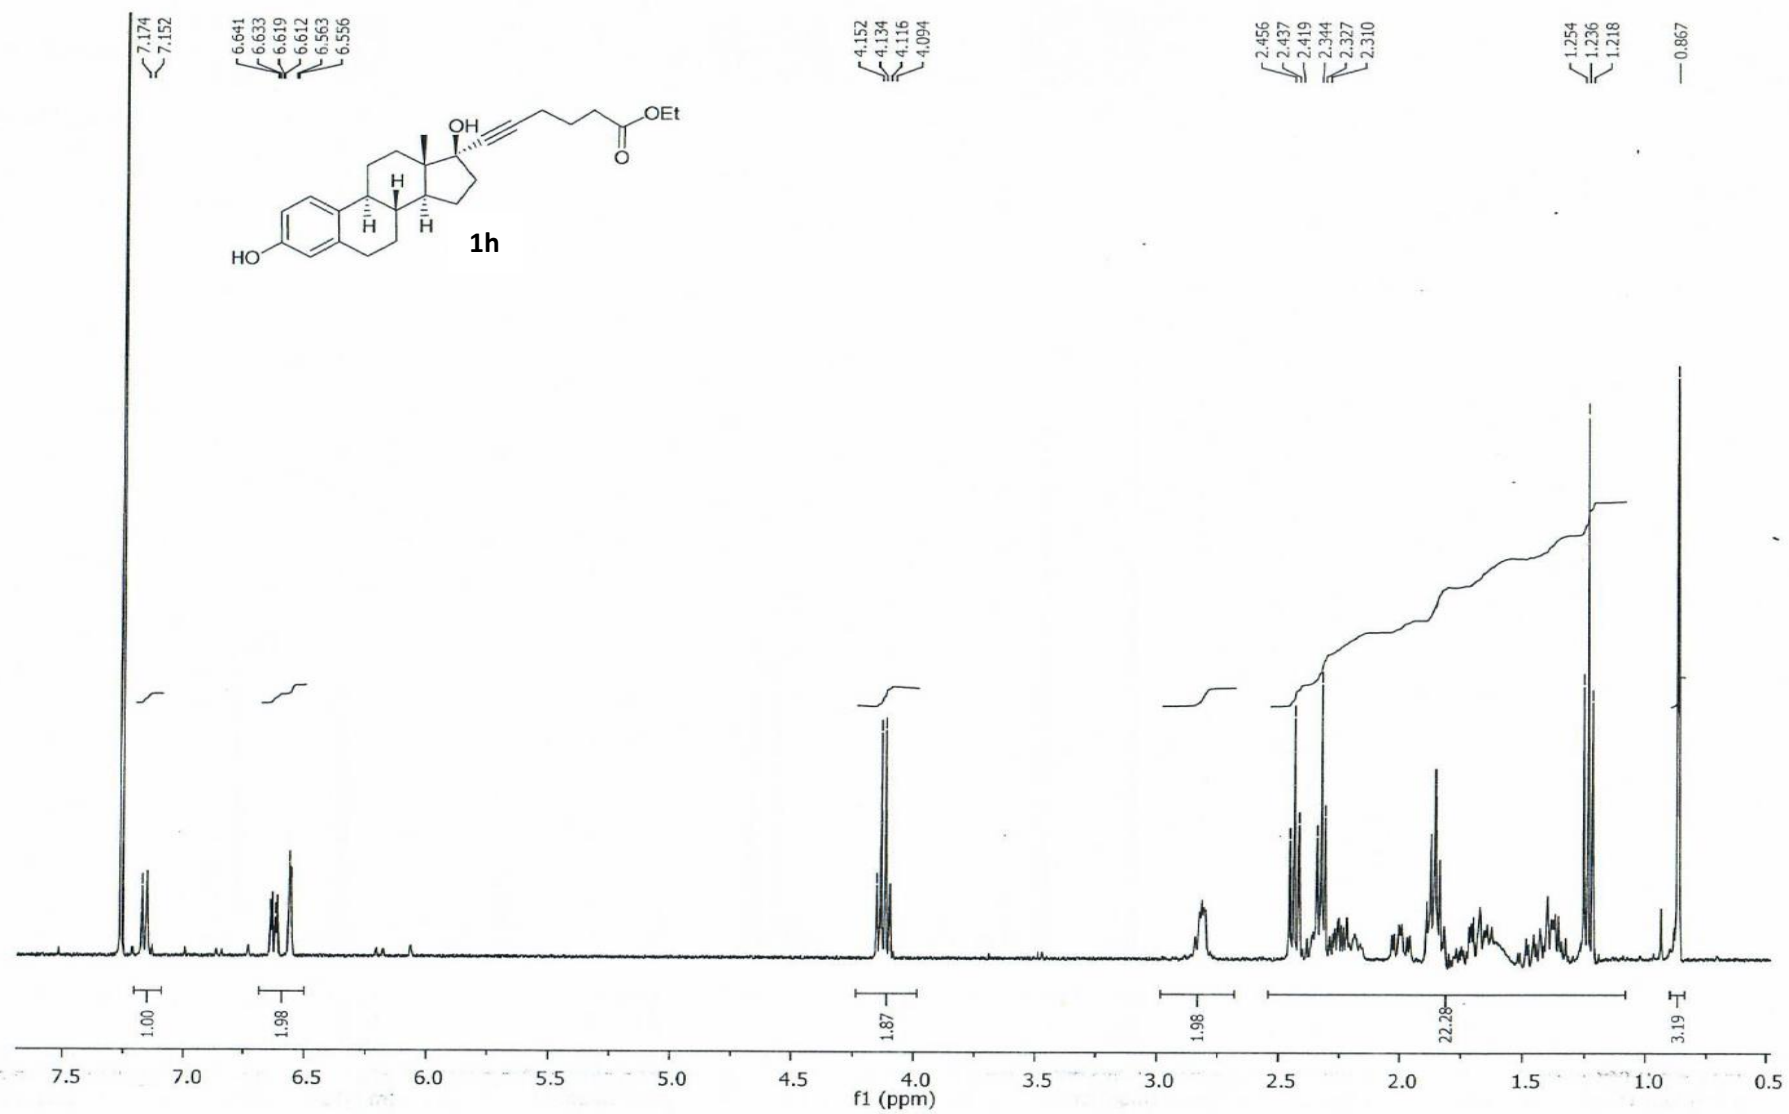

— 173.3968

— 153.5601

— 138.3696

— 132.6769

— 126.6587

— 115.3726

— 112.8158

85.2254

84.7764

80.1818

77.5841

77.1603

76.7376

— 60.6294

49.6491

47.3121

43.7609

39.5612

39.2329

33.3543

33.0512

29.7887

27.3568

26.5827

24.1365

22.9762

— 18.4312

14.3399

12.9541

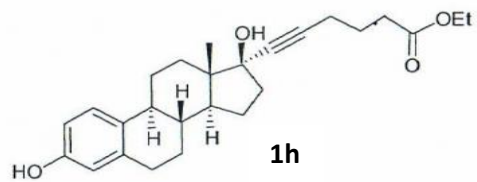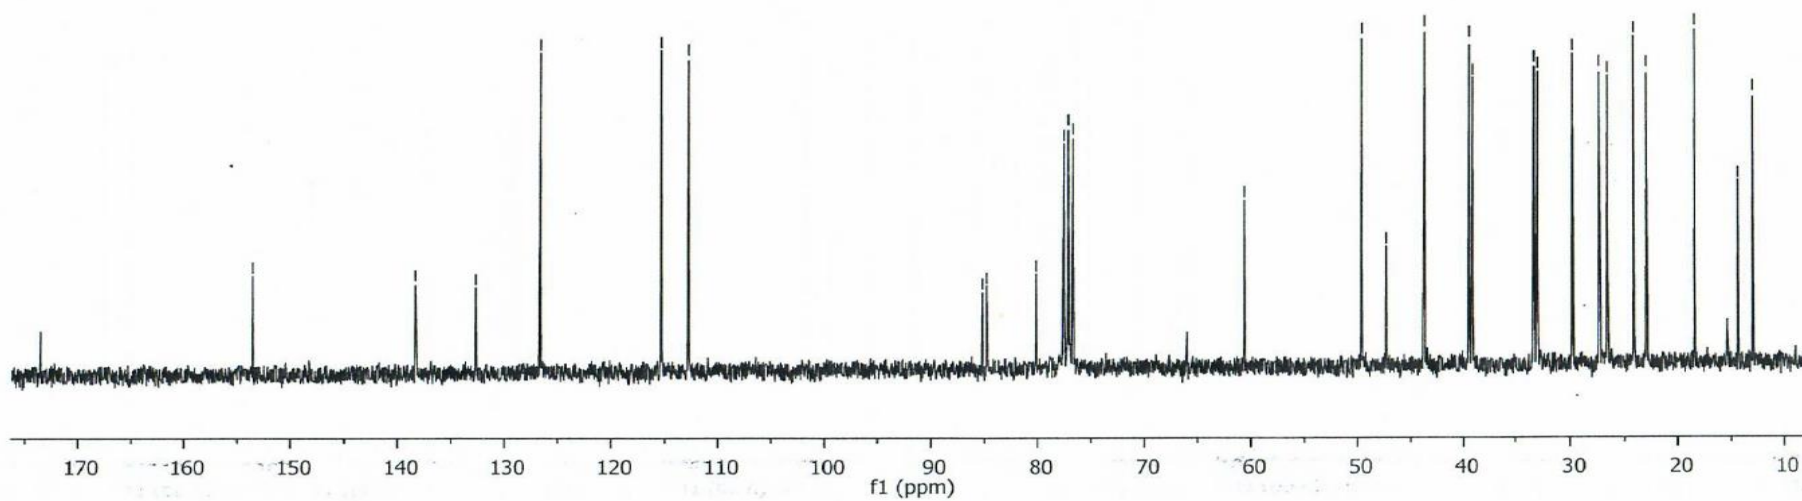

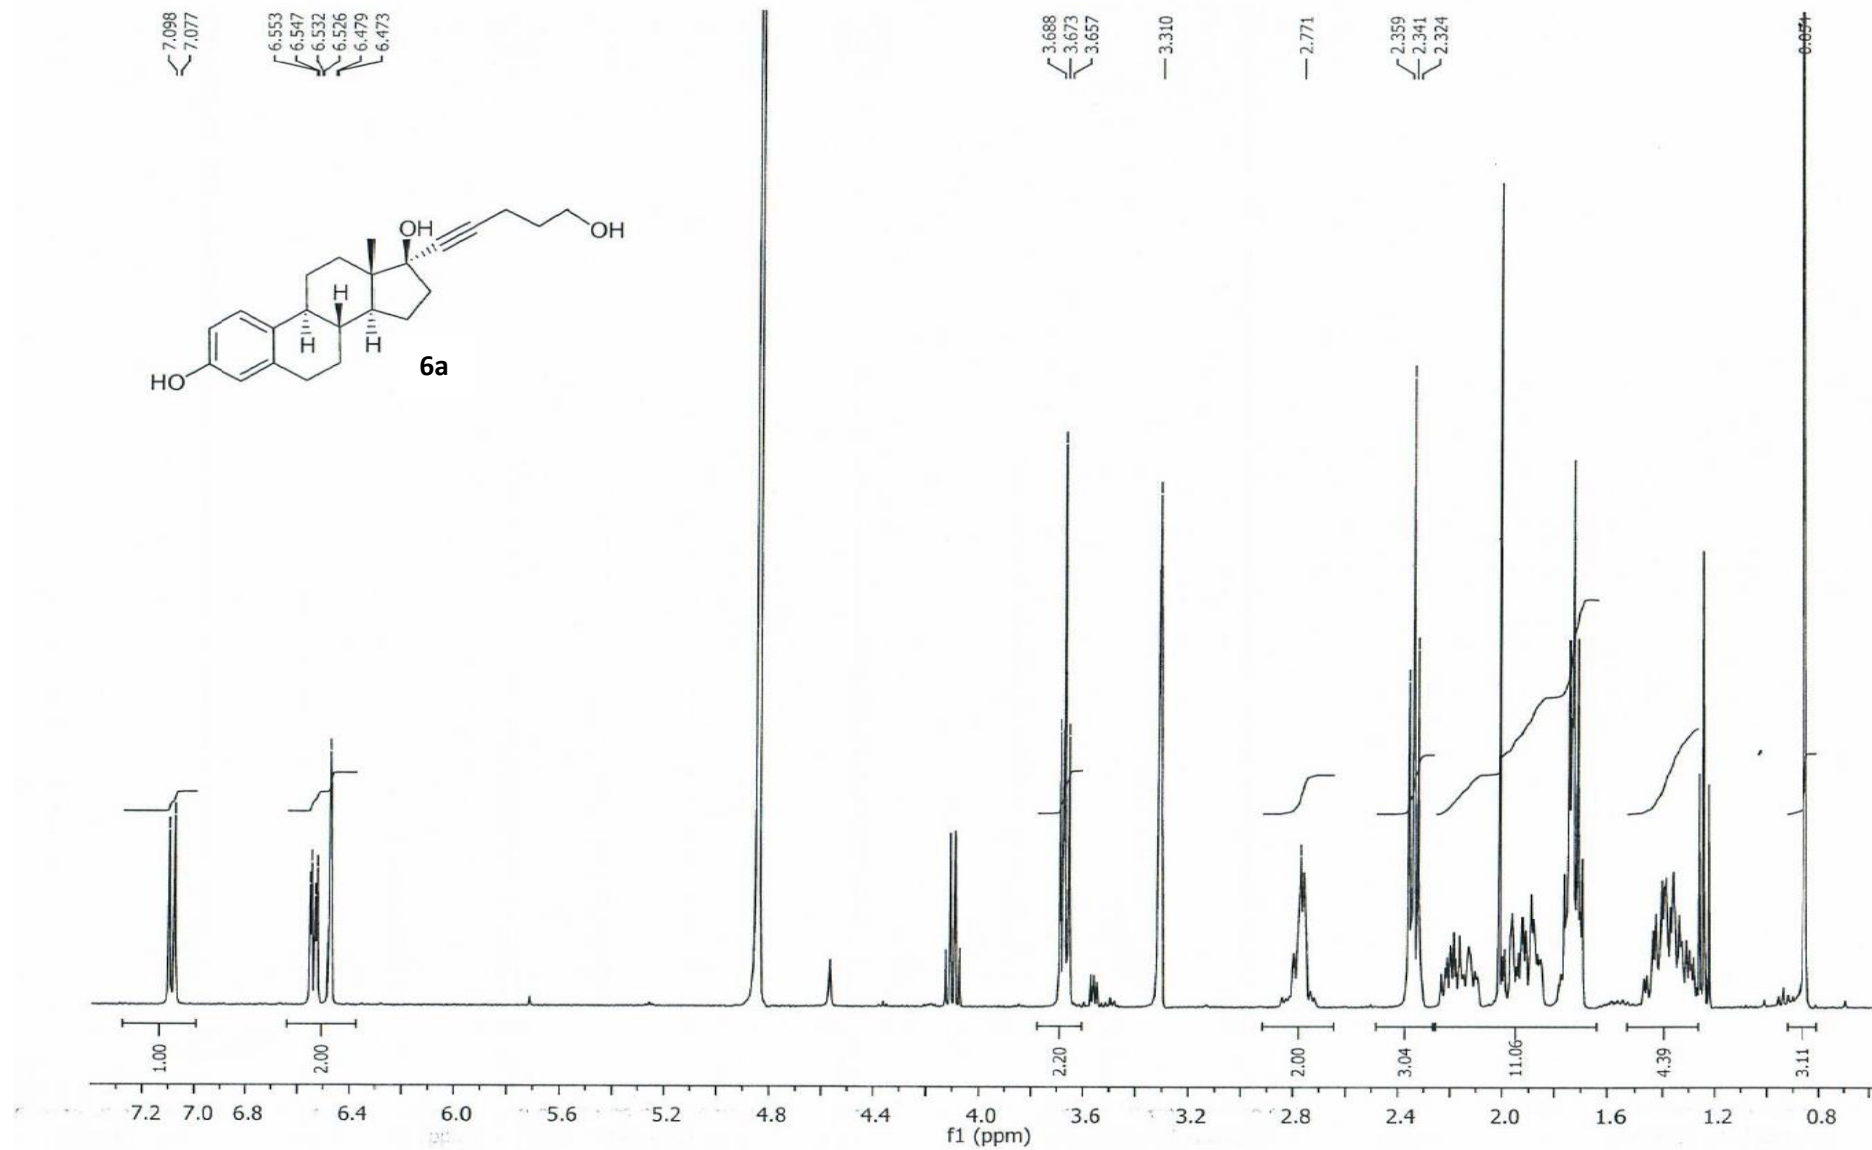

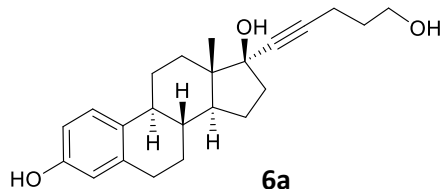

— 154.4986  
 — 137.4042  
 { 131.1363  
 { 131.1214  
 — 125.8271  
 — 114.6291  
 — 112.3304

{ 84.4324  
 { 83.9401  
 — 79.1383

— 60.3049

{ 49.4103  
 { 49.3919  
 { 47.5876  
 { 46.9817  
 { 43.8135  
 { 39.7672  
 { 38.6062

{ 32.8258  
 — 31.4560  
 { 29.3406  
 { 27.2607  
 { 26.3599  
 — 22.3145

{ 14.5554  
 { 13.0483  
 { 12.0765  
 { 12.0573

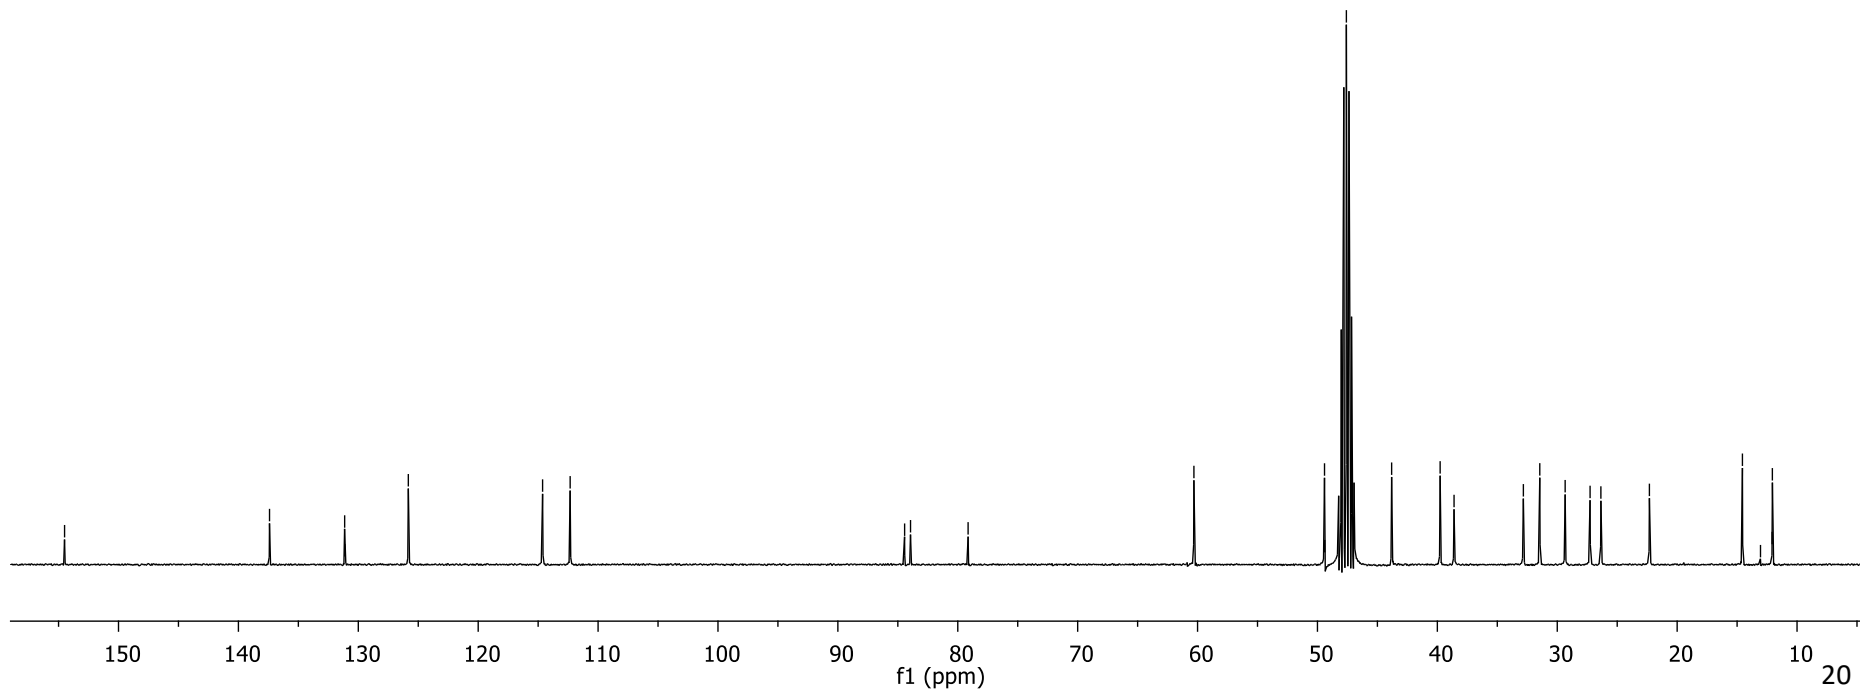

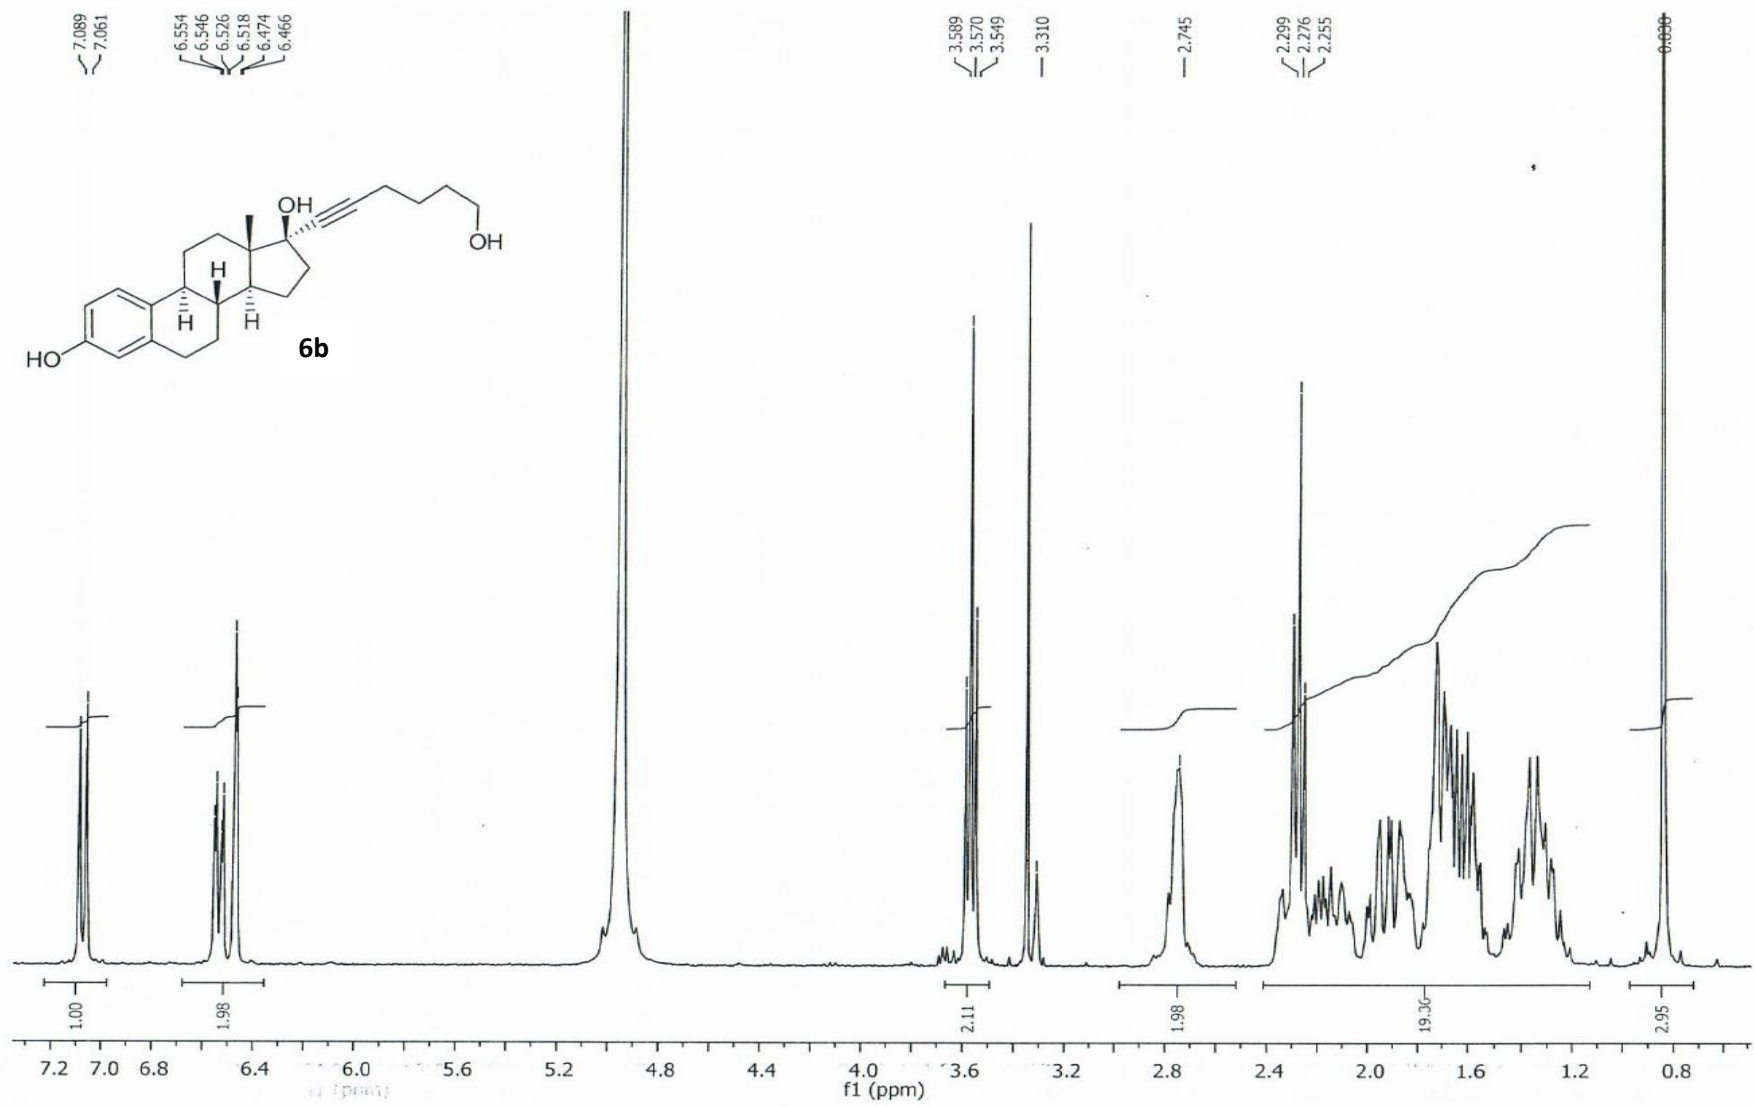

— 155.8435  
 — 136.7914  
 — 132.5638  
 — 127.2126  
 — 116.0444  
 — 113.7319

~ 86.2287  
 ~ 85.3678  
 — 80.5445

— 62.4389

— 50.7802  
 — 49.0005  
 — 48.3646  
 — 45.1685  
 — 41.1243  
 — 40.0214

— 34.1931  
 — 32.7636  
 — 30.7129  
 — 28.6490  
 — 27.7393  
 — 26.4204  
 — 23.7120  
 — 19.2650  
 — 13.4827

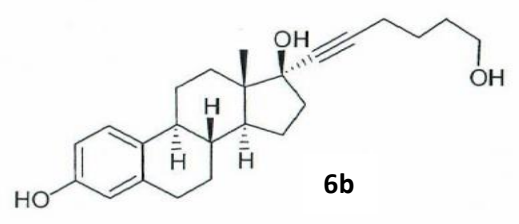

— 49.00  
 — 48.36

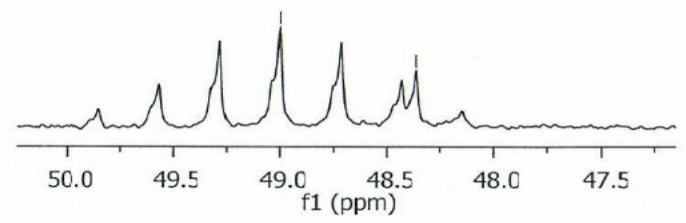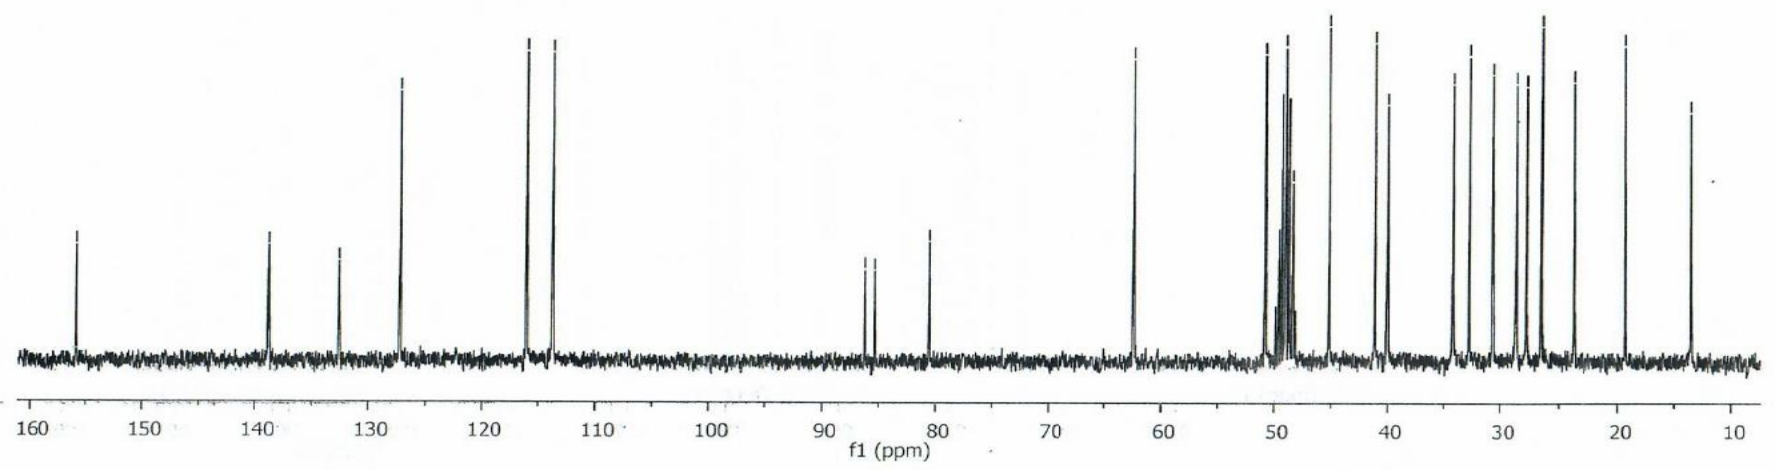

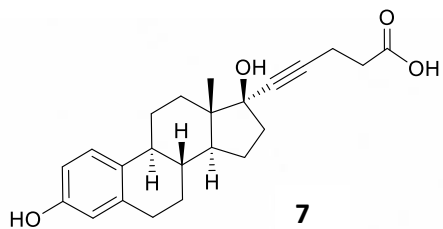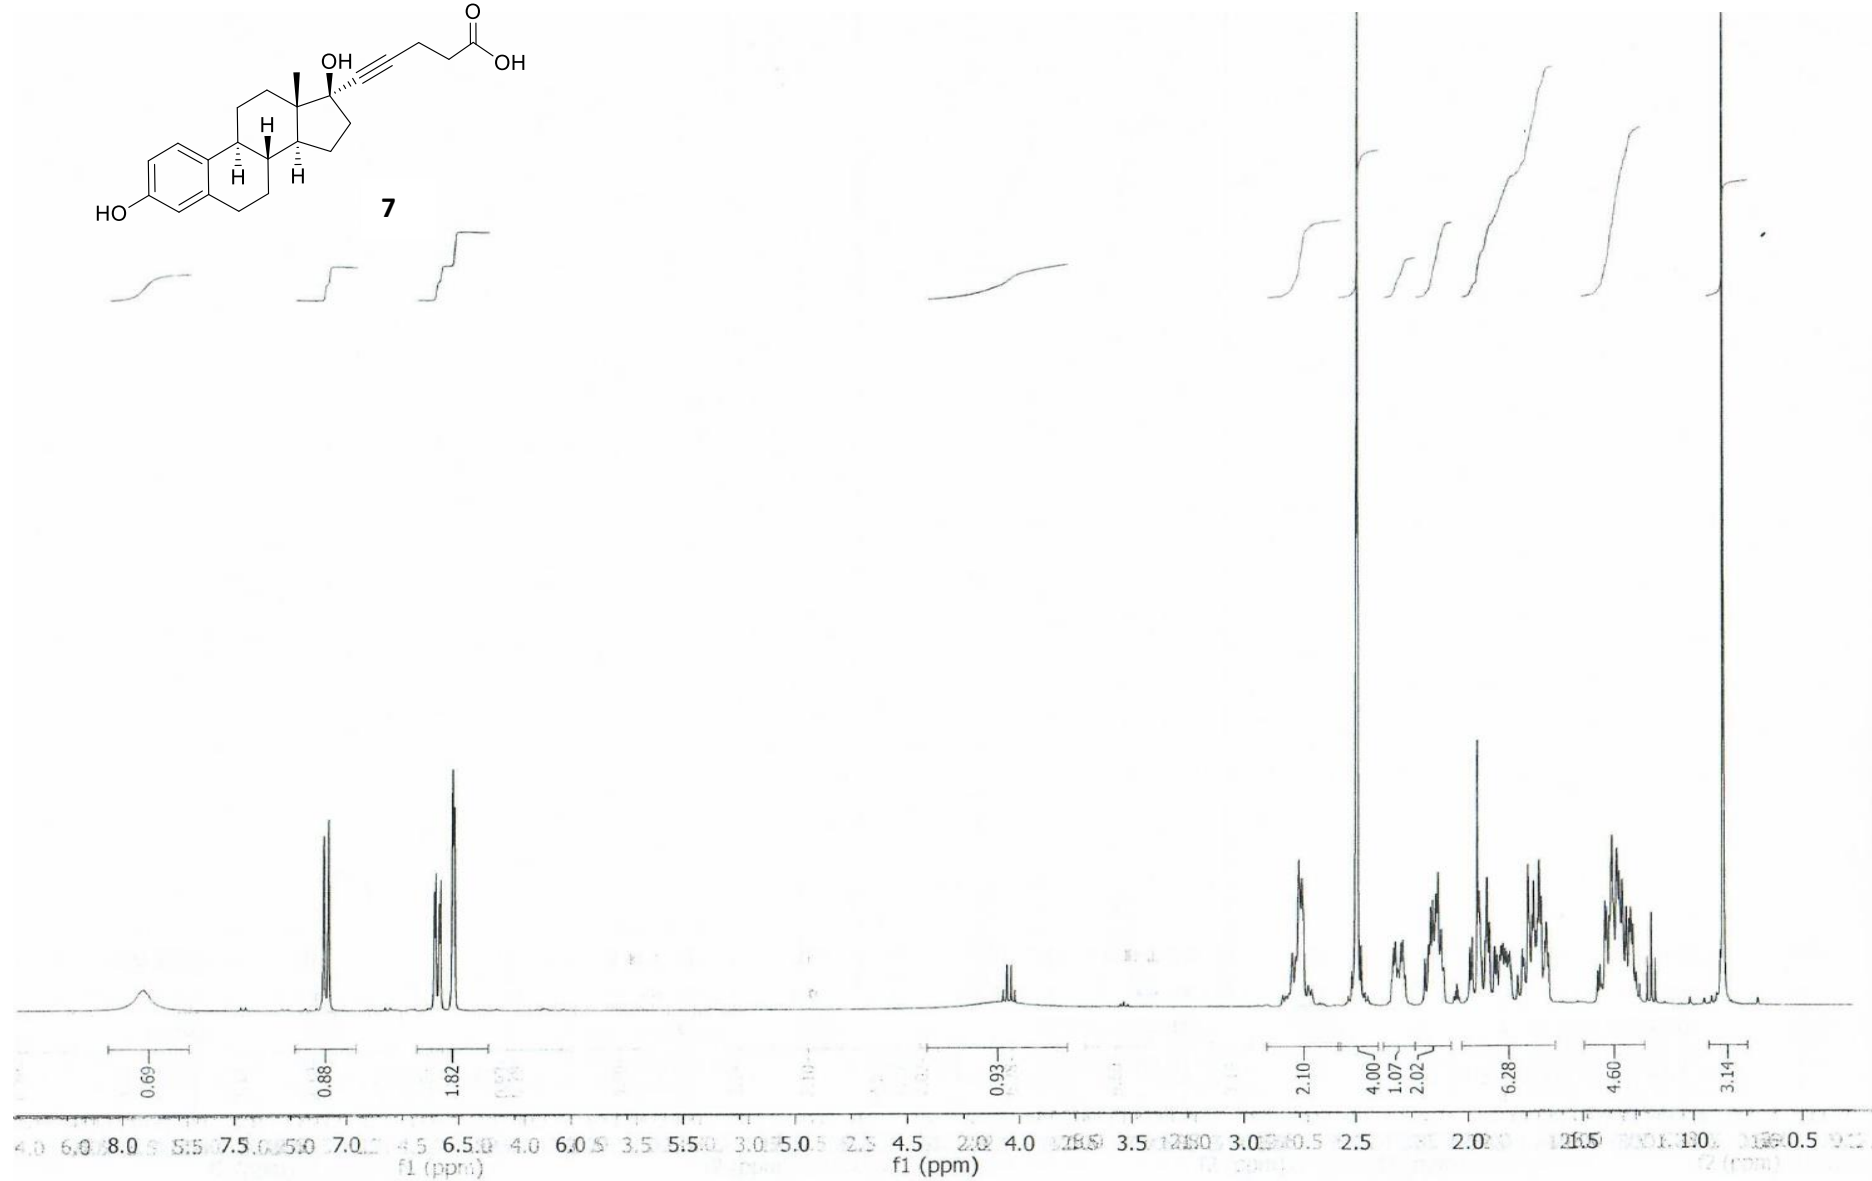

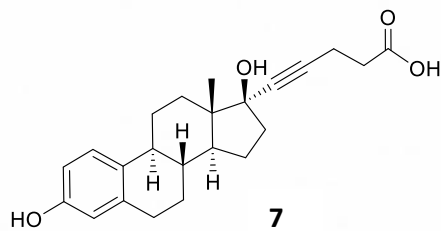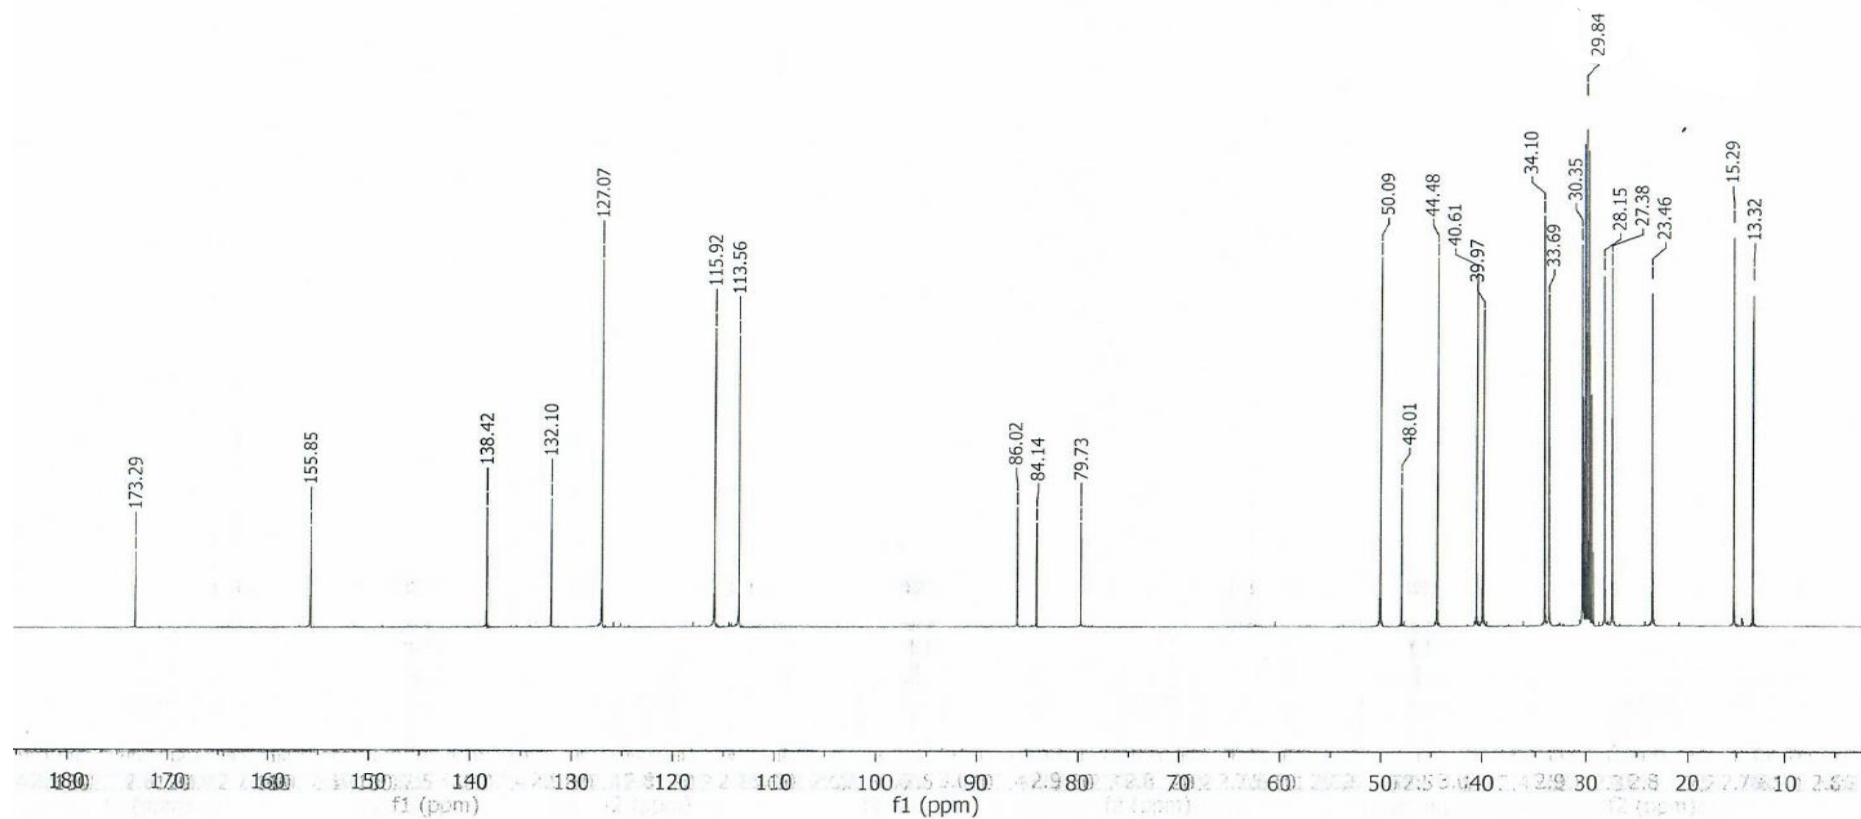

Supplement: 41598_2017_2820_MOESM1_ESM.pdf [file 41598_2017_2820_MOESM1_ESM.pdf]
